1 **TITLE:**

2 **Carriers of mitochondrial DNA macrohaplogroup L3 basic**  
3 **lineages migrated back to Africa from Asia around 70,000 years**  
4 **ago.**

5

6 Vicente M. Cabrera<sup>1\*</sup>, Patricia Marrero<sup>2</sup>, Khaled K. Abu-Amero<sup>3,4</sup>,  
7 Jose M. Larruga<sup>1</sup>

8 \*Correspondence: vicente.vca811@gmail.com

9 <sup>1</sup>Departamento de Genética, Facultad de Biología, Universidad de  
10 La Laguna, E-38271 La Laguna, Tenerife, Spain.

11

12 **ABSTRACT**

13 **Background:** After three decades of mtDNA studies on human  
14 evolution the only incontrovertible main result is the African origin of  
15 all extant modern humans. In addition, a southern coastal route has  
16 been relentlessly imposed to explain the Eurasian colonization of  
17 these African pioneers. Based on the age of macrohaplogroup L3,  
18 from which all maternal Eurasian and the majority of African  
19 lineages originated, that out-of-Africa event has been dated around  
20 60-70 kya. On the opposite side, we have proposed a northern route  
21 through Central Asia across the Levant for that expansion.

22 Consistent with the fossil record, we have dated it around 125 kya.  
23 To help bridge differences between the molecular and fossil record  
24 ages, in this article we assess the possibility that mtDNA  
25 macrohaplogroup L3 matured in Eurasia and returned to Africa as  
26 basic L3 lineages around 70 kya.

27 **Results:** The coalescence ages of all Eurasian (M,N) and African  
28 L3 lineages, both around 71 kya, are not significantly different. The  
29 oldest M and N Eurasian clades are found in southeastern Asia  
30 instead near of Africa as expected by the southern route hypothesis.  
31 The split of the Y-chromosome composite DE haplogroup is very  
32 similar to the age of mtDNA L3. A Eurasian origin and back  
33 migration to Africa has been proposed for the African Y-  
34 chromosome haplogroup E. Inside Africa, frequency distributions of  
35 maternal L3 and paternal E lineages are positively correlated. This  
36 correlation is not fully explained by geographic or ethnic affinities. It  
37 seems better to be the result of a joint and global replacement of the  
38 old autochthonous male and female African lineages by the new  
39 Eurasian incomers.

40 **Conclusions:** These results are congruent with a model proposing  
41 an out-of-Africa of early anatomically modern humans around 125  
42 kya. A return to Africa of Eurasian fully modern humans around 70  
43 kya, and a second Eurasian global expansion by 60 kya. Climatic  
44 conditions and the presence of Neanderthals played key roles in  
45 these human movements.

46 **Keywords:** Human evolution, mitochondrial DNA, haplogroup L3, Y-  
47 chromosome, haplogroup E, out-of-Africa

48

## 49 **BACKGROUND**

50 From a molecular genetics perspective, the hypothesis of a recent  
51 African origin of modern humans by around 200 thousand years age  
52 (kya) was formulated three decades ago [1]. Today this hypothesis  
53 is widely accepted. There is also multidisciplinary agreement that

54 the out-of-Africa expansion of modern humans promoted the  
55 extinction of other hominins in Eurasia with only a minor assimilation  
56 of their genomes [2]. However, despite the enormous quantity of  
57 data accumulated during these years, mainly from the analysis of  
58 the mtDNA and Y-chromosome haploid markers, there is a lack of  
59 consensus about the time/s and route/s followed by modern humans  
60 moving out of Africa. All the indigenous mtDNA diversity outside  
61 Africa is comprised into clades M and N, that are branches of the  
62 African haplogroup L3 [3–5]. This fact puts a genetic time frame for  
63 the out of Africa dispersal around 55-70 kya that is the coalescence  
64 age of haplogroup L3 [6]. Likewise, recent Y-chromosome sequence  
65 analysis detected a cluster of major non-African founder  
66 haplogroups in a short time interval at 47-52 kya [7]. However, it has  
67 to be mentioned that the tick of the molecular clock depends on the  
68 mutation rate employed [8, 9]. These temporal windows for the exit  
69 of modern humans out-of-Africa are at odds with fossil,  
70 archaeological and ancient DNA data. Skeletal remains unearthed in  
71 the Skhul and Qafzeh caves demonstrated that early modern  
72 humans were present in the Levant between 125 and 80 kya [10].  
73 The discovery of modern human teeth in southern China dated to  
74 120-80 kya [11], also supports the presence of anatomically modern  
75 humans (AMHS) in eastern Asia during this period. Several  
76 archaeological studies uncovered Middle Stone Age (MSA) lithic  
77 assemblages, dated around 125-75 kya, in different regions of the  
78 Arabian Peninsula, presenting affinities with northeastern African  
79 assemblages of the same period [12–14]. These findings suggest  
80 that African AMHS may have extended its geographic range to  
81 eastern and northern Arabia long before the time frame proposed by  
82 molecular data. Ancient DNA (aDNA) analysis is being a major tool

83 in the reconstruction of the past human history. Using these  
84 analyses, the Neanderthal introgression into modern humans in  
85 Europe has been dated within 35-65 kya [15] which is well in frame  
86 with the molecular clock window established for the African exit of  
87 modern humans. However, an ancient gene flow from early modern  
88 humans into the ancestors of eastern Neanderthals more than 100  
89 kya has been recently reported [16]. These data evidenced that  
90 early modern humans and ancestors of Neanderthals from the  
91 Siberian Altai region interbred much earlier than previously thought.  
92 Besides, whole-genome based studies proposed the split of  
93 Eurasian from African populations at 88-112 kya [17], and that the  
94 presence of AMHS out of Africa is earlier than 75 kya [18]. A way to  
95 avoid all these contradictory pieces of evidence is to state that all  
96 these ancient movements out of Africa, prior to 70 kya, did not  
97 contribute genetically to present-day human populations. However,  
98 we think that major effort should be dedicated to finding a more  
99 conciliatory explanation.

100 Concerning the potential routes followed by modern humans out of  
101 Africa, there are two main alternatives not mutually exclusive: a  
102 northern dispersal along the Nile-Sinai corridor, and a southern  
103 dispersal from the Horn of Africa across the Bab al Mandeb strait. At  
104 the beginning of the mtDNA phylogeographic studies, the virtual  
105 absence of mtDNA haplogroup M in the Levant, and its presence in  
106 Ethiopia, southern Arabia, the Indian subcontinent and East Asia,  
107 rendered M the first genetic indicator of a southern route exit from  
108 eastern Africa [19]. At that time, it was suggested that this was  
109 possibly the only successful early dispersal event of modern  
110 humans out of Africa. Shortly after, based on the rarity of mtDNA

111 haplogroup N(xR) in India, and its continuous presence above the  
112 Himalayas, we proposed an additional northern route through the  
113 Levant [4]. Afterward, intensive and extensive research on mtDNA  
114 has been carried out, not only in populations from Central [20–23]  
115 and East Asia [24–26] but, also, from the regions covering the  
116 hypothetical southern route path as India [27–30], Mainland  
117 southeastern Asia [31–33], Island southeast Asia [34–39], New  
118 Guinea, North Island Melanesia and Australia [40–44]. The most  
119 striking global result was that while in Central and North Asia the  
120 indigenous lineages observed were derived branches of southern  
121 haplogroups, primary and independent autochthonous M and N  
122 clusters were found in every main region of meridional Asia and  
123 Australasia. Most surprising was the fact that some N haplogroups  
124 in southern China (N10, N11) resulted older than the oldest N  
125 western Asia lineages (N1, N2), or that some M haplogroups in  
126 Melanesia (M27, Q) were older than the oldest Indian M lineages  
127 (M2, M33). Different researchers gave conflicting interpretations to  
128 these results. Some perceived them as a confirmation of a rapid  
129 southern coastal spread of modern humans from Africa [30, 45–47].  
130 Others claimed an old local population differentiation in each region  
131 without any evidence of the shared ancestry expected by the  
132 southern dispersal model [48–50]. The existence of a northern route,  
133 deduced from the phylogeography of macrohaplogroup N [4], has  
134 received additional support from the fossil record [11], from whole  
135 genome studies comparing Egyptian and Ethiopian populations [51],  
136 and by the fact that all non-African populations present a signal of  
137 Neanderthal introgression [52]. However, we realized that what  
138 actually macrohaplogroup N points to is a human movement from  
139 southeastern Asia to western Asia [53]. We observed the same

140 sense for macrohaplogroup M. In this case, expanding westwards to  
141 India [54], and a similar trend follows macrohaplogroup R, the main  
142 sister branch of N [55]. Thus, we confirmed that macrohaplogroup M  
143 and N indicated, respectively, major southern and northern  
144 expansions of modern humans but, ironically, in the opposite sense  
145 we predicted long ago [4]. It has to be mentioned that studies based  
146 on Y-chromosome sequences also pointed to southeastern Asia as  
147 a primitive center of human expansions [56–59]. Now, if we do admit  
148 that basic L3 lineages (M, N) have independently evolved in  
149 southeastern Asia instead in Africa or near of the African continent  
150 borders where the rest of L3 lineages expanded, we are confronted  
151 with the dilemma of where the basic trunk of L3 evolved. A  
152 gravitating midpoint between eastern Africa and southeastern Asia  
153 would situate the born of L3 in inner Asia, with possible opposite  
154 expansions back to Africa and forward to eastern Asia. At this point,  
155 it has to be mentioned that this possibility has been already  
156 modeled, among other options, obtaining the highest likelihood  
157 value [60] but, in our opinion, it has not received the attention it  
158 deserves. The parallelism of this early back to Africa of mtDNA  
159 haplogroup L3 with that proposed for the Y-chromosome haplogroup  
160 E [61] is striking.

161 In this work, we assess the possibility that L3 could have exited from  
162 Africa as a pre-L3 lineage that evolved as basic L3 in inner Asia.  
163 From there, it came back to Africa and forwarded to southeastern  
164 Asia to lead, respectively, the African L3 branches in eastern Africa  
165 and the M and N L3 Eurasian branches in southeastern Asia. This  
166 model, that implies an earlier exit of modern humans out of Africa,

167 has been contrasted with the results gathered independently by  
168 other disciplines.

169

## 170 **MATERIAL AND METHODS**

### 171 **Sampling information**

172 A total of 69 complete mtDNA genomes were sequenced in this  
173 study (Additional file 1: Table S1). They comprise the main African L  
174 haplogroups, excepting L6. To remedy this lack, 12 already  
175 published complete L6 sequences were included in our phylogenetic  
176 tree (Additional file 2: Figure S1). The different branches of  
177 haplogroup L3 are represented by 45 of these sequences. To  
178 establish the relative frequency of mtDNA macrohaplogroup L3 in  
179 the main African regions, a total of 25,203 partial and total mtDNA  
180 publicly available sequences were screened. Of them, 1,138 belong  
181 to our unpublished data (Additional file 1: Table S2). Similarly, to  
182 establish the relative frequency of Y-chromosome macrohaplogroup  
183 E in the main African regions, a total of 21,286 Y-chromosome  
184 publicly available African samples were screened. Of them, 737  
185 belong to our unpublished data (Additional file 1: Table S2). All our  
186 samples were collected in the Canary Islands or Saudi Arabia from  
187 academic and health-care centers. The procedure of human  
188 population sampling adhered to the tenets of the Declaration of  
189 Helsinki and written consent was recorded from all participants  
190 before taking part in the study. The study underwent a formal review  
191 and was approved by the College of Medicine Ethical Committee of  
192 the King Saud University (proposal N° 09-659) and by the Ethics



193 Committee for Human Research at the University of La Laguna  
194 (proposal NR157).

195

### 196 **MtDNA sequencing**

197 Total DNA was isolated from buccal or blood samples using the  
198 POREGENE DNA isolation kit from Gentra Systems (Minneapolis,  
199 USA). PCR conditions and sequencing of mtDNA genome were as  
200 previously published [4]. Successfully amplified products were  
201 sequenced for both complementary strands using the  
202 DYEnamic™ETDye terminator kit (Amersham Biosciences).  
203 Samples run on MegaBACE™ 1000 (Amersham Biosciences)  
204 according to the manufacturer's protocol. The 69 new complete  
205 mtDNA sequences have been deposited in GenBank under the  
206 accession numbers MF621062 to MF621130 (Additional file 1: Table  
207 S1).

### 208 **Previously published data compilation**

209 Sequences belonging to specific mtDNA L haplogroups were  
210 obtained from public databases such as NCBI, MITOMAP, the-1000  
211 Genomes Project and the literature. We searched for mtDNA  
212 lineages directly using diagnostic SNPs  
213 (<http://www.mitomap.org/foswiki/bin/view/MITOMAP/WebHome>), or  
214 by submitting short fragments including those diagnostic SNPs to a  
215 BLAST search (<http://blast.st-va.ncbi.nlm.nih.gov/Blast.cgi>).  
216 Haplotypes extracted from the literature were transformed into  
217 sequences using the HaploSearch program  
218 (<http://www.haplosite.com/haplosearch/process/>) [62]. Sequences  
219 were manually aligned and compared to the rCRS [63] with BioEdit  
220 Sequence Alignment program [64]. Haplogroup assignment was



221 performed by hand, screening for diagnostic positions or motifs at  
222 both hypervariable and coding regions whenever possible.  
223 Sequence alignment and haplogroup assignment were carried out  
224 twice by two independent researchers and any discrepancy resolved  
225 according to the PhyloTree database (Build 17;  
226 <http://www.phylotree.org/>) [65]. For the screening of the Y-  
227 chromosome haplogroup E, we considered samples as belonging to  
228 this haplogroup if in their analysis resulted positive for, at least, the  
229 diagnostic DE-YAP or E-M40, E-M96 markers.

### 230 **Phylogenetic analysis**

231 The phylogenetic tree was constructed using the Network program,  
232 v4.6.1.2 using, in sequent order, the Reduced Median algorithm,  
233 Median Joining algorithm and Steiner (MP) algorithm [66].

234 Remaining reticulations were manually resolved. Haplogroup  
235 branches were named following the nomenclature proposed by the  
236 PhyloTree database [65]. Our coalescence ages were estimated by  
237 using statistics rho [67] and Sigma [68] and the calibration rate  
238 proposed by Soares et al.[6].

239 To calculate the total mean age of each haplogroup we recompiled  
240 all its different estimation ages from the literature without taken into  
241 account the mtDNA sequence segment analyzed, the mutation rate  
242 considered, or the inevitable partial overlapping of the samples  
243 used. In the cases where the same sample set was used to  
244 calculate its age by different methods, we always chose that  
245 performed with the rho statistic as the most generalized method  
246 (Additional file 1: Table S3). To calculate haplogroup mean  
247 coalescence ages for the non-recombining region of the Y-  
248 chromosome (NRY), we recompiled estimations preferably based on

249 single nucleotide polymorphisms (SNPs) obtained by sequencing.  
250 When different mutation rates were used in the same study, we  
251 chose the age calculated with the slowest mutation rate (Additional  
252 file 1: Table S4).

253

## 254 **Phylogeographic analysis**

255 In this study, we deal with the earliest periods of the out-of-Africa  
256 spread of modern humans and the likely return to Africa of the  
257 carriers of primitive mtDNA L3 and Y-chromosome E lineages.  
258 As the phylogeography of the different branches of these lineages  
259 has been exhaustively studied by other authors to assess more  
260 recent human movements on the continent, we focus here on its  
261 global distributions in the major African regions. For  
262 phylogeographic purposes, we divided the African continent into the  
263 following eight major regions: 1. Northwest Africa (including  
264 Morocco, West Sahara, Algeria and Tunisia), 2. Northeast Africa  
265 (including Libya and Egypt), 3. West Sahel (including Mauritania,  
266 Mali, and Niger), 4. East Sahel (including Chad, Sudan, Ethiopia,  
267 Somalia, and Eritrea), 5. West Guinea (including Senegambia,  
268 Guinea-Bissau, Guinea-Conakry, Sierra-Leona, Liberia, Ivory-Coast,  
269 Burkina-Faso, Ghana, Togo, Benin, and Nigeria), 6. Central Africa  
270 (including Cameroon, Central African Republic (CAR), Congo  
271 Democratic Republic (CDR), Congo-Brazzaville, Gabon and  
272 Equatorial Guinea), 7. East Guinea (including Uganda, Rwanda,  
273 Kenya, and Tanzania), 8. Southern Africa (including Angola,  
274 Zambia, Malawi, Mozambique, Zimbabwe, Botswana, Namibia and  
275 South African Republic (SAR)).

276 To evaluate the level of geographic structure of the mtDNA  
277 macrohaplogroup L3 and the Y-chromosome macrohaplogroup E in

278 Africa, we performed AMOVA and K-means clustering analyses. We  
279 used the GenAlEx6.5 software to implement AMOVA and XLSTAT  
280 statistical software to perform the K-means clustering analysis. The  
281 possible association between the frequencies of mtDNA  
282 macrohaplogroup L3 and those of the Y-chromosome  
283 macrohaplogroup E, in the whole African continent, and in its  
284 principal geographic subdivisions, were tested by Pearson  
285 correlation analyses using the XLSTAT statistical software. As an  
286 important overlap exists among the expansion ages of the L3  
287 branches with those of the African widespread mtDNA  
288 macrohaplogroup L2, the global frequencies of L2 have also been  
289 included in the majority of the phylogeographic analyses performed.

290

## 291 **RESULTS AND DISCUSSION**

292

### 293 **Phylogeny and affinities of our African complete sequences**

294

295 As a general rule, our 69 mtDNA complete sequences (Additional  
296 file 2: Figure S1) could be allocated into previously defined clades in  
297 the PhyloTree. Their closest affinities were with other sequences of  
298 the same haplogroups. Thus, our Kenyan L3a1a (Kn028) sequence  
299 shares tip mutations 514, 3796 and 4733 with a Tanzanian  
300 sequence (EF184630) but only 514 with a Somalian sequence  
301 (JN655813) of the same clade. The Sudanese L3b1a (Su238)  
302 sequence shares the very conservative transition at 12557 with an  
303 L3b sequence (KF055324) from an African-American glaucoma  
304 patient [69]. Our L3b1a2 (Su002) sequence has matches at 195,  
305 12490 and 16311 with several African sequences (EU092669,  
306 EU092744, EU092795, EU092825, EU9355449) with which could

307 make up a new branch, L3b1a2a, defined by these three transitions.  
308 In the same way, the L3f2a1 (Su004) has matches at mutated  
309 positions 6182, 8676, 9731, 12280, 12354 and 13105 with other  
310 published Senegalese sequences (JN655832, JN655841) with  
311 which could conform a new derived branch. It is expected that L  
312 sequences detected in the Canary Islands have their closest  
313 relatives in the African continent. Indeed, this is the case, for  
314 instance, for the L3d1b3 (Go764) sequence from La Gomera island  
315 that shares tip transitions 14040 and 16256 with an Ovimbundu  
316 isolate (KJ185837) from Angola [70]. However, unexpectedly, there  
317 are Canarian sequences as TF0005, allocated into the L3f1b  
318 subclade, that has its closest relatives in the Iberian Peninsula,  
319 sharing the 8994 transition with two Asturian L3f1b sequences  
320 (KJ959229, KJ959230) [71]. Similar is the case of the L3x2 (TF116)  
321 sequence from Tenerife that shares all its terminal variants(650,  
322 7933, 8158, 15519, 16261) with sequences from Galicia  
323 (HQ675033, JN214446) and Andalusia (KT819228) instead of  
324 African sequences. Saudi Arabia has been identified as a universal  
325 receptor of mtDNA Eurasian lineages, which is also valid for the  
326 African female flow. Arab sequences belonging to the L3i1a (AR429)  
327 and L3x1a1 (AR260) haplogroups have their closest relatives with  
328 sequences JN655780 and DQ341067 respectively from the nearby  
329 Ethiopia, and the L3h1b1 (AR381) sequence is identical to an  
330 already published Yemeni isolate (KM986547). However, the  
331 L3h1b2 (AR221) sequence is most related to the JQ044990 lineage  
332 from Burkina Faso [72], with which shares particular transitions at  
333 7424, 13194, 16192 and 16218 positions. The affinities of the Arab  
334 L1c2b1a'b (AR1252) with other sequences are the most striking.  
335 This sequence, particularly characterized by the presence of an

336 insertion of 11 nucleotides at the 16029 position in the control  
337 region, has an exact match with an L1 isolate from the Dominican  
338 Republic (DQ341059). Its closest relatives in Africa, although  
339 without that insertion, have been found in Angola (KJ185814) and  
340 Zambia (KJ185662) among Bantu-speakers [70]. The control region  
341 of this AR1252 isolate was previously published (KP960821).  
342 Concerning the less frequent L4, L5, and L6 clades, our L4b1a  
343 (Iv136) sequence from the Ivory Coast shares tip mutations 789,  
344 7166 and 14935 with geographically close sequences (JQ044848,  
345 JQ045081) from Burkina Faso [72]. Likewise, the Arab L4a2  
346 (AR1116) sequence is closely related to other African L4a2  
347 sequences (EU092799, EU092800), and the L4b2a1 (AR197)  
348 isolate resulted identical to a sequence (KM986608) from Yemen  
349 [73]. From the analysis of partial sequences [53, 74], we can assure  
350 representatives of branches L4a1, L4a2 and L4b2 exist in Saudi  
351 Arabia. However, we have not yet detected sequences belonging to  
352 the large Sudanese L4b1b clade (Additional file 2: Figure S1).  
353 Published [53, 74] and unpublished data allow us to confirm that L5a  
354 is represented in Saudi Arabia by at least a lineage that has the  
355 following haplotype in, and nearby the coding region: 15884, 16093,  
356 16129, 16148, 16166, 16187, 16189, 16223, 16265C, 16311,  
357 16355, 16362/ 73, 152, 182, 195, 198, 247, 263, 315iC, 455i2T,  
358 459iC, 513, 522dCA, 709, 750, 769, 825A, 851, 930. It represents  
359 0.58% of the Saudi mtDNA gene pool. There is also a L5b lineage  
360 characterized by mutations at: 15927, 16111, 16129, 16148, 16166,  
361 16187, 16189, 16223, 16233, 16254, 16265C, 16278, 16360,  
362 16519/ 73, 195, 247, 249d, 263, 315iC, 459iC, 501, 535, 750, 769,  
363 and 825A, with minor presence (0.09%) in Saudi Arabia. For the  
364 same reason, although we lack complete L6 sequences, from partial

365 sequencing and specific SNP analysis, we can confirm that L6a1  
366 (0.13%) and L6b (0.09%) lineages are also present in the Saudi  
367 population [53, 74]. With 12 complete sequences, L3h is the best-  
368 represented haplogroup in our phylogeny (Additional file 2: Figure  
369 S1). In it, we have, provisionally, defined some new branches. We  
370 think that retromutation at 16223 position could define a Sudanese  
371 L3h1a1a branch. Two clades, L3h1a2a1a and L3h1a2a1b could be  
372 characterized by transitions 3892, 7705, 15346 and transitions 5108,  
373 16165 respectively. An additional subclade, defined by transitions  
374 7310, 13153, 14407 and transversion 9824A has been provisionally  
375 named as L3h1a2b1. Finally, after introducing the AR221 sequence,  
376 the old branch L3h1b2 would be characterized only by transitions  
377 294, 8842, 9758, 12882, 13437, 16129, and 16362.

378 Our only discrepancy with the PhyloTree phylogeny, is about to the  
379 rare and old L5 clade. We have identified a new branch,  
380 provisionally named L5c (Additional file 2: Figure S1). With the  
381 information provided by this lineage, we think that the PhyloTree L5b  
382 node, that joints haplogroups L5b1 and L5b2 by sharing  
383 retromutations at 182, 13105 and 16311 positions and transition at  
384 16254 position, lacks phylogenetic robustness. Instead, the  
385 PhyloTree L5b2 clade would be better considered a sister branch of  
386 our new Sudanese L5c sequence (Su412), both joined by the  
387 sharing of retromutation at the 195 position and transition at the  
388 6527 and 11809 positions.

389 Lastly, it is worth mentioning that, despite the relatively small sample  
390 sizes employed, our coalescence age results fit well into the  
391 standard deviations calculated for the different haplogroups  
392 (Additional file 1: Table S3). Even so, mean age values for the L3  
393 macrohaplogroup in Africa ( $71 \pm 12$  kya), that theoretically marks the



394 lower bound time for the out-of-Africa of modern humans, falls short  
395 compared to those obtained from the fossil record in the Levant [75].

396

### 397 **The Eurasian origin of macrohaplogroup L3**

398 The southern route hypothesis proposes that the Eurasian branches  
399 (M and N) of the macrohaplogroup L3 differentiated in or near the  
400 African continent and rapidly spread across the Asian peninsulas to  
401 reach Australia and Melanesia [45]. Under this assumption, it is  
402 expected that, in general, coalescence ages of haplogroups should  
403 decrease from Africa to Australia. However, we have demonstrated  
404 that this is not the case [53–55]. Just on the contrary, The oldest M  
405 and N haplogroups are detected in southern China and Australasia  
406 instead of India, and associations between longitudinal geographic  
407 distances and relative ages of M and N haplogroups run, against to  
408 expectation, westwards with younger haplogroup ages going to  
409 Africa [53, 54]. So, we confront a dilemma; it seems that two gravity  
410 centers of L3 expansion exist, one in Africa and the other in  
411 southeastern Asia. A geographic equidistant midpoint would situate  
412 the primitive radiation of L3 in India if a southern route were chosen  
413 by the African colonizers or above the Himalayas, between Tibet  
414 and Pamir, if the northern route was preferred. Furthermore, as the  
415 coalescence age of the African L3 branches and that of the Eurasian  
416 L3 (MN) are very similar (Table 1) and around 71 kya, the temporal  
417 and spatial midpoints might also coincide. As the group of modern  
418 humans that hypothetically turned back to Africa should include  
419 females and males, searching for the Y-chromosome phylogenetic  
420 and phylogeographic information might give us additional  
421 information. Indeed, an origin in Asia and return to Africa was  
422 proposed, long ago, for the Y-chromosome African haplogroup E



423 [61]. This hypothesis was based on the derived state of its African  
424 YAP<sup>+</sup> haplotypes 4 and 5 (haplogroup E) respect to the ancestral  
425 Asian YAP<sup>+</sup> haplotype 3 (Haplogroup D). The later discovery of new  
426 markers evidenced that D and E were, in fact, sister branches of the  
427 YAP<sup>+</sup> node. Haplogroup D showing the derived status for M174 and  
428 the ancestral status for M40 in Asia and, on the contrary, haplogroup  
429 E being characterized by M40 derived and M174 ancestral status all  
430 around Africa, so that the migratory sense between continents of  
431 both haplogroups could not be assured [76]. A few YAP<sup>+</sup> individuals,  
432 ancestral for both markers, were detected in West Africa [77] and in  
433 Tibet [78]. Although assigned to the para-haplogroup DE\*, its real  
434 ancestral state could not be confirmed. Likewise, a new mutation  
435 (P143) united the two other Eurasian haplogroups C and F as  
436 brothers and, in turn, DE and CF were united in an ancestral node  
437 defined by mutations M168 and M294 [79]. At first, the solution  
438 proposed to this complicated scenario was that two independent  
439 migrations out of Africa occurred, one marked by D and the other by  
440 the CF pair of lineages [80]. However, a new twist occurred after the  
441 discovery of more than 60,000 single nucleotide variants by next  
442 generation sequencing techniques. A most parsimonious  
443 interpretation of the Y-chromosome phylogeny constructed with  
444 these variants is that the predominant African haplogroup E arose  
445 outside the continent and back-migrated to Africa [59]. The DE split  
446 as a lower bound ( $69.0 \pm 14.7$  kya) and the radiation of E into Africa  
447 as an upper bound ( $65.5 \pm 8.5$  kya) are dates highly coincidental  
448 with those estimated for the mtDNA haplogroup L3 expansions  
449 (Table 1). Furthermore, the spatial distribution of the residual Y-  
450 chromosome haplogroup D in Asia is also a good indicator of the  
451 geographical location of the putative DE split. The highest frequency

452 and diversity of D is in the Tibet region. Although it is also present,  
453 at low incidence, throughout southeast Asia, the other two centers  
454 with notable frequency are in Japan and the Andaman Islands [78,  
455 81, 82], pointing to the existence of edge relic areas of which could  
456 be, long ago, a more wide distribution. There are not native D  
457 lineages in India, weakening the possibility that this subcontinent  
458 was the center of the DE partition and, therefore, taking the wind out  
459 of the southern route supporters. Most probably, the divide of the Y-  
460 chromosome D and E haplogroups occurred up to the Himalayas  
461 and in or westward to the Tibet which also coincides with the  
462 hypothetical bifurcation center proposed for the mtDNA L3  
463 macrohaplogroup. As these coincidental female and male splits  
464 occurred during a glaciations time (70 - 100 Kya), it is reasonable to  
465 think that cold climatic conditions forced humans southwards and,  
466 confronted with the Himalayas, dispersed across southeastern and  
467 southwestern Asia. Most probably, this climatic change also obliged  
468 the Neanderthals to broaden its southern range and, therefore, to  
469 augment its geographic overlap with humans and, possibly, with  
470 Denisovans, outcompeting them in search of recourses (Figure 1).  
471 This southward retreat was stronger at the western side, as  
472 witnessed by the total occupation of the Levant by the Neanderthals  
473 around 70 kya [83] and the forced return of modern humans,  
474 carrying mtDNA L3 and Y-chromosome E basic lineages, to Africa.  
475 However, the tables turned around 20 ky later. Then were modern  
476 humans who advanced westwards from inner Asia displacing  
477 Neanderthals in its way, colonizing East Asia, South Asia, and  
478 Central Asia from where they reached the Levant around 50 kya  
479 [84] and Europe short after [85–87]. It is worth mentioning that this  
480 westward modern human colonization was also proposed from an

481 archaeological perspective [87, 88]. Under this scenario, early  
482 modern humans had to leave Africa much earlier than the time  
483 frame proposed by the geneticists under the mitochondrial molecular  
484 clock restrictions [89]. In a conciliatory approach, we would fix this  
485 period at the L3'4 or even at the L3'4'6 mtDNA coalescence nodes.  
486 That is, around 80 to 100 kya (Table 1), in such a way that, at least,  
487 mutations 769, 1018 and 16311, that define the basic L3\* lineage,  
488 occurred already out of Africa. In the same way, the exit of the  
489 companion men could be dated at the split of branch CDEF-M168  
490 from B-M181 about 86-120 kya [59, 90]. However, given the  
491 inaccuracies of the molecular clock, we rather prefer to trust on the  
492 fossil and climatic records to establish the out of Africa of early  
493 modern humans across the Levant around 125 kya as the most  
494 favorable period.

495

### 496 **The phylogeography of the L3 and E lineages inside Africa**

497 The global mean frequencies of the mtDNA and NRY haplogroups in  
498 the six main regions of the African continent are presented in Table  
499 2. The mtDNA haplogroup L3 is more frequent in sub-Saharan  
500 Africa than in North Africa or the Sahel. In contrast, the Eurasian  
501 mtDNA haplogroups, including M1 and U6, are more frequent in  
502 northern Africa and the Sahel than in sub-Saharan Africa. In  
503 general, the Y-chromosome haplogroup E is more frequent in  
504 western than eastern Africa while the Eurasian Y haplogroups show  
505 a contrary trend. This geographic distribution confirms that the  
506 history of Africa is marked by multiple Eurasian migratory waves that  
507 pushed the first carriers of female haplogroup L3\* and male  
508 haplogroup E\* basic lineages inside Africa. It has been suggested  
509 that the few sub-Saharan haplogroups present in northern Africa are

510 the result of recent historical incorporations [91]. Ancient DNA  
511 studies in the area seem to confirm this assumption both, in the  
512 northwest [92] and the northeast [93]. The fact that L3k, the only  
513 autochthonous L3 lineage in northern Africa, has only a residual  
514 presence in the area is also in favor of that suggestion [94]. Under  
515 this supposition, male E lineages, present nowadays in North Africa,  
516 would have reached the area as a secondary wave escorting  
517 Eurasian female lineages as M1 and U6. In fact, the main  
518 indigenous E clades in the region, E-M81 in the northwest, and E-  
519 M78 in the northeast are derived of haplogroup E-M35 which has  
520 also European Mediterranean and western Asian branches as E-  
521 V13 and E-V22 [95]. Against early studies that considered a  
522 Paleolithic implantation of E-M81 in the Maghreb [96, 97], it was  
523 suggested later that the low microsatellite diversity of this clade in  
524 northwest Africa could be better explained as the result of Neolithic  
525 or post-Neolithic gene flow episodes from the Near East [98].  
526 However, after that, the discovery of a new sister branch of E-M81,  
527 named E-V257 [99], without Near Eastern roots but present in the  
528 European western and central Mediterranean shores and in  
529 Cameroon and Kenyan populations [99, 100], has weakened the  
530 suggested Levantine connection. Furthermore, E-M81 and E-M78  
531 precursors are very old lineages that, respectively, accumulated 23  
532 and 16 mutations in their basal branches. It has been reported that  
533 E-M78 radiated in eastern Africa in a time window between 20 and  
534 15 kya but E-M81 did not, most probably because it was already in  
535 the Maghreb at that time. This would coincide with the expansion  
536 age in the area of the mtDNA U6a haplogroup [101]. Thus, a recent  
537 re-expansion after a large bottleneck would be the best explanation  
538 for the low variance of E-M81 in the present days [102]. The

539 persistence of an even older male demographic substrate in this  
540 area has been evidenced by the detection in the region of  
541 representatives of the deepest Y phylogenetic clades A0 and A1a  
542 [103]. There is general consent in attributing an eastern African  
543 origin to the initial expansion of the NRY haplogroup E in the  
544 continent [100]. Curiously, ancestral E\* lineages have been detected  
545 in the Arabian Peninsula [104] and the Levant [105]. Regardless of  
546 its origin, haplogroup E shows lower frequencies in northeastern  
547 Africa and the eastern Sahel compared with their counterparts in the  
548 West. Just the opposite occurs with the respective frequencies of Y  
549 Eurasian haplogroups in the same areas (Table 2), which points to  
550 later stronger Eurasian male gene flow throughout the northeastern  
551 side.

552 Detailed frequencies for mtDNA haplogroups L2 and L3 and Y-  
553 chromosome haplogroup E, all around the African continent, are  
554 listed in Additional file 1: Table S2. We have included L2 in the  
555 analysis because it was the sister clade of the composite eastern  
556 African node L3'4'6 that, through consecutive range expansions,  
557 promoted the exit of the L3 precursor out of Africa. Besides, inside  
558 Africa, several L2 derived spreads coincide in time with the later  
559 expansion of L3 branches in the continent. Furthermore, there is a  
560 suggestive positive association between the mean frequency  
561 estimates for L2 and the Y-chromosome haplogroup E across the  
562 major African regions (Table 2). In fact, there is a significant positive  
563 correlation between E haplogroup frequencies and both L3 ( $r =$   
564  $0.400$ ;  $p < 0.0001$ ) and L2 ( $r = 0.347$ ;  $p < 0.0001$ ) mtDNA  
565 haplogroup frequencies across Africa. Even more, this correlation is  
566 strongest when the E frequencies are compared with the sum of the  
567 two L2 and L3 frequencies ( $r = 0.477$ ;  $p < 0.0001$ ). However, the

568 strength of this association varies in the different regions  
569 considered. Thus, the correlation is not significant at all in northern  
570 Africa, as could be expected from the picture commented above. It  
571 is barely significant in the Sahel region ( $r = 0.246$ ;  $p = 0.045$ ), but  
572 highly significant in the rest of the regions, with special intensity in  
573 southern Africa ( $r = 0.615$ ;  $p < 0.0001$ ). Nevertheless, these  
574 correlations are only slightly associated with geography as deduced  
575 from the AMOVA analysis that shows only a 4% of the variance due  
576 to differences among regions (Table 3). It seems that the E and  
577 L2/L3 expansions were strongest in western Sahel and western  
578 Guinea where they substituted the majority of the oldest mtDNA (L0  
579 and L1) and Y-chromosome (A and B) lineages (Table 2). We  
580 applied the k-means clustering algorithm to our L3 and E frequency  
581 data (Additional file 1: Table S2). The consecutive partitioning of the  
582 samples into clusters has the objective of minimizing the variance  
583 within groups and augmenting the variance among them (Table 3).  
584 At  $k = 5$ , less than 20% of the variance is due to differences within  
585 clusters. At this level, the five classes obtained have centroid means  
586 for L3 and E that minimize the mean-square distance of the samples  
587 grouped to this center (Table 4 and Additional file 1: Tables S5 and  
588 S6). Class I, characterized by a relatively low frequency for both L3  
589 and E haplogroups, joins the majority of the Khoesan-speaking  
590 groups from South Africa, Namibia, and Angola and the Hadza from  
591 Tanzania, but also several pygmy groups from Cameroon, Gabon,  
592 CAR and Congo as the Baka and the Babinga. In addition to their  
593 different geographic locations, these groups are also differentiated  
594 by the frequencies of other haplogroups. Thus, Khoesan-speaking  
595 samples harbor high frequencies of mtDNA L0d and L0k  
596 haplogroups and Y-chromosome A lineages, while the Central



597 African Pygmies are characterized by the highest frequency of  
598 mtDNA L1c and Y-chromosome B-M60 lineages. In its turn, the  
599 Hadza share with pygmy groups the high percentages for B-M60  
600 chromosomes and the highest frequency for mtDNA haplogroup L4  
601 in the whole African continent. Other groups that belong to this class  
602 are the majority of Nilotes from Sudan and Uganda, characterized  
603 by their high frequencies of mtDNA haplogroup L2a1, and several  
604 Afro-Asiatic-speaking samples from Egypt and Sudan showing  
605 likewise high levels of L2a1 lineages but also of mtDNA L0a1 and Y-  
606 chromosome B representatives. Practically, the rest of the Khoesan-  
607 speaking samples fall into Class II characterized because, keeping a  
608 low frequency for L3 has an intermediate frequency for E (Table 4),  
609 pointing to a male-biased gene flow from western sub-Saharan  
610 Africans. At this class also belong the rest of the central Africa  
611 pygmies, including Sanga, Mbenzele, Biaka, and Mbuti, all still  
612 harboring high frequencies of Y B-M60 and L1c lineages. This class  
613 includes mainly northeast African and Ethiopian samples speaking  
614 Afro-Asiatic languages, some Nilo-Saharan speaking groups as the  
615 Fur from Sudan, the Anuak from Ethiopia or the Maasai from Kenya,  
616 and Bantu-speakers as the Shona from Zimbabwe and Botswana or  
617 the Tswana from Botswana and South Africa. However, the bulk of  
618 the northwestern African Afro-Asiatic speaking groups falls into  
619 Class III, defined by low frequencies of L3 and high frequencies of E  
620 (Table 4). A general low frequency for mtDNA haplogroup L2 is also  
621 a characteristic of this grouping. The majority of Berber and Tuareg  
622 samples belong to this class including the Gossi, Tamashek, and  
623 Douentza from Mali and the Gorom from Burkina Faso. Interestingly,  
624 the click-speaking Sandawe and the Nilo-Saharan speaking Datog  
625 from Tanzania are also assorted into Class III. From the maternal



626 side, these Tanzanian samples are characterized by their relatively  
627 high frequencies of haplogroups L0a and L4. Nevertheless, the most  
628 abundant component of this class belongs to the Niger-Congo  
629 speakers including the majority of the Senegalese samples but also  
630 southern African specific Bantu-speakers as the Zulu and Xhosa.  
631 Curiously, the click-speaking Xeg Khoesan and Khwe belong to this  
632 cluster, pointing to substantial gene flow from Bantu-speaking  
633 immigrants. This fact was reported long ago for the Khwe that were  
634 found more closely linked to non-Khoesan-speaking, Bantu,  
635 populations [106]. Another class dominated by Niger-Congo  
636 speakers is Class IV, the largest of all. It groups samples that  
637 possess intermediate frequencies for L3 but high frequencies for E  
638 (Table 4). Linia and Kanembou from Chad, Rimaibe from Burkina-  
639 Faso, Songhai from Nigeria, and Masalit from Sudan are the only  
640 Nilo-Saharan speakers in this class. All the western African  
641 countries are represented by different Niger-Congo speaking  
642 groups, including the Bateke pygmies from Congo. There are also  
643 instances of eastern or southern African Bantu representatives.  
644 Finally, Class V groups those samples that present high frequencies  
645 for both, L3 and E, haplogroups (Table 4). Again, Niger-Congo  
646 speakers are the majority, although Nilo-Saharan from western  
647 countries as Menaka of Mali, Diffa of Niger and Kanuri from Nigeria  
648 likewise those of eastern countries as Bongor from Chad and Luo  
649 from Kenya are included in this class. The two best-represented  
650 countries are the western sub-Saharan Africa Nigeria and  
651 Cameroon which provided most of the Niger-Congo speaking  
652 samples. Nevertheless, there are also Bantu specific speakers from  
653 Kenya and southern Africa. This group includes the click-speakers  
654 Damara from Namibia and South Africa, who genetically have been

655 associated to Bantu-speaking instead of to other Khoesan-speaking  
656 groups [107].

657 The above-commented results show that the positive correlation  
658 found between Y-chromosome haplogroup E and mtDNA  
659 haplogroup L3 (and L2) lineages is neither strongly associated with  
660 the geography nor with language. It is better explained as the result  
661 of a gradual substitution of the most basal mtDNA (L0, L1, L5) and  
662 Y-chromosome (A, B) lineages by the phylogenetically younger  
663 clades L2 and L3, and E respectively throughout Africa. The data  
664 also point to important sex-biased dispersals between populations.  
665 These evident gene replacements in Africa have been mainly  
666 attributed to recent geographic range expansions of pastoralist and  
667 agriculturalist populations from eastern and western Africa at the  
668 expense of the hunter-gatherers inhabitants of the Central Africa  
669 rainforest [108–110], eastern African forested areas around the  
670 Great Lakes [111–114], and the semi-desert open spaces of South  
671 Africa [115–118]. Under our hypothesis of an early return to Africa  
672 from Eurasia of basic mtDNA L3 and Y-chromosome E lineages,  
673 and their expansion around 70 kya first into East and later into West  
674 Africa, those lineage replacements must have begun very early. It  
675 seems that in this first spread mtDNA haplogroup L2 was  
676 incorporated by favored female assimilation, whereas their  
677 hypothetical Y-chromosome haplogroup B counterparts were  
678 outcompeted by the incoming E chromosomes. An ancient  
679 expansion from a Central African source into eastern Africa at 70-50  
680 kya has been associated with haplogroup L2 [119]. Likewise, an  
681 early expansion within Africa 60-80 kya involving L3 and, possibly,  
682 L2 was already detected long ago [120]. The last mentioned spread  
683 was considered the crucial event in the exit of modern humans from

684 Africa into Eurasia. However, our proposition is that it signaled a  
685 backflow from Eurasia and subsequent expansion into Africa.

686 Finally, it seems interesting to point out that our hypothesis of an  
687 early return and subsequent expansion inside Africa of carriers of L3  
688 and E haplogroups could help to explain, in a different way, the  
689 Neanderthal introgression detected in the western African Yoruba  
690 [121, 122], and in the northern African Tunisian Berbers [122].

691

### 692 **A new mtDNA model about the origin and dispersion of Homo** 693 **sapiens**

694 At mtDNA level, the sampling and data accumulated during the last  
695 thirty years, including those contributed by ancient DNA studies,  
696 allow us to propose a more detailed model of the origin and  
697 worldwide spread of modern humans than the ones proposed three  
698 decades ago. There are three fossil series in northwest, northeast,  
699 and southern Africa that chronologically and morphologically  
700 recapitulated the evolution of Homo sapiens from early archaic  
701 around 600 kya to early moderns by 200 kya [123]. The recent  
702 dating of Middle Stone Age tools ( $315 \pm 34$  kya) and early modern  
703 human fossils ( $286 \pm 32$  kya) from Jebel Irhoud in Morocco, places  
704 the emergence of our species, and of the Middle Stone Age, close in  
705 time and long before the age of about 200 kya previously suggested  
706 for the common origin of all humans in eastern Africa [124]. These  
707 data coincide in time with the existence of an old Y-chromosome  
708 lineage (A00) detected in samples of western-central African  
709 ascendance and dated 338 kya (95% CI: 237-581 kya), remarkably  
710 older than common estimates based on the Y-chromosome and  
711 mtDNA TMRCA [125]. The fact that the following more divergent Y-  
712 chromosome A lineages (A0, A1a) also have a western-central

713 African location, strongly supports this region as the origin of an  
714 ancestral human population from which the ancestors of early  
715 modern humans emerged [90, 103]. The most ancient splits and  
716 spreads of the mtDNA lineages also situated the hypothetical origin  
717 of all extant maternal lineages around this area. Although the  
718 earliest L0 clade diverged around 145 kya (Additional file 1: Table  
719 S3) and had its first expansions in southern Africa (L0d, L0k), the  
720 subsequent splits gave rise to L1 and L5 around 131 kya and 123  
721 kya spreading to western and eastern Africa respectively. These  
722 long range African dispersions place its putative origin somewhere  
723 in Central Africa (Figure 1a). The same "centre-of-gravity" argument  
724 was used by other authors to suggest a Central African origin [126].  
725 It is worth mentioning that while ancestral southern African  
726 Khoesan-speaking population still maintain high frequencies of  
727 primitive L0d and k lineages [94, 106, 127, 128], and that in the  
728 hunter-gatherer populations of central-western Africa the L1c  
729 haplogroup is dominant [108, 109], L5 in eastern Africa has today  
730 only a marginal presence [114, 129], most probably due to its  
731 displacement produced by more recent waves of better adapted  
732 incomers. The presence of L5 in southern Africa and eastern Mbuti  
733 pygmies [70, 109, 118, 127] is the result of later migrations. Most  
734 probably, next split, around 100 kya, also occurred in Central Africa  
735 resulting in sister clusters L2 and L3'4'6 that, respectively, produced  
736 initial westward and eastward expansions (Figure 1a). Although the  
737 oldest L2 lineages have been sampled in western Africa [130],  
738 today, as result of successive spreads inside the continent, this  
739 clade has a pan-African range [119]. In eastern Africa, the cluster  
740 L3'4'6 was the embryo of the full Eurasian maternal diversity. Its first  
741 split was haplogroup L6 that nowadays is a rare eastern lineage with

742 a deep founder age (about 100 kya) but a rather recent expansion  
743 (about 25 kya). It has been found at frequencies below 1% in  
744 Egyptians [131], Somalis [132], Kenyan [133], and eastern Nilotes  
745 from Uganda [114]. Mean frequency rise in Ethiopia ( $3.15 \pm 1.15$  %)  
746 with a maximum (15.8%) in Ongota, an extinguishing linguistic  
747 isolate of uncertain adscription [129]. Outside Africa L6 has not been  
748 detected in the Levant [134]. It is present in the Arabian Peninsula at  
749 frequencies below 1% in Saudi samples but raises 12% in some  
750 Yemeni samples [135]. Attending to the L6 phylogeny (Additional file  
751 2: Figure S1), it seems that not all the Yemeni lineages are a subset  
752 of the eastern African lineages as there is at least one for which its  
753 common node coincides with the expansion of the whole  
754 haplogroup. Based on its peculiar phylogeography, the possibility  
755 that L6 could have originated from the same out-of-Africa southern  
756 migration that colonized Eurasia was suggested [135]. If this were  
757 the case, this early L6 expansion would give genetic support to the  
758 reported presence of modern humans in the Arabian Peninsula,  
759 around 125 kya, based on archaeological evidence [12–14]. This  
760 suggestion also enjoys climatic support as this period coincides with  
761 humid environmental conditions in Arabia [136]. However, it seems  
762 that this possible human expansion did not extend beyond the  
763 Peninsula as L6 derived lineages have not yet been detected across  
764 Eurasia. The return to arid conditions, most probably, caused the  
765 decline of the populations carrying the L6 lineage that had to retreat  
766 to refuge areas as the highlands of Yemen and Ethiopia until more  
767 favorable conditions made possible their subsequent recovery in  
768 eastern Africa and Yemen. The long mutational stem that precedes  
769 the expansion of L6 (Additional file 2: Figure S1), would faithfully  
770 represent that strong and long bottleneck. Next phylogenetic

771 bifurcation produced the ancestors of L3 and L4 haplogroups  
772 (Additional file 2: Figure S1). Nowadays, the highest frequencies  
773 and diversities of L4 are found in eastern Africa, but it has spread  
774 over the entire continent (Table 3). Besides, it has been detected at  
775 frequencies below 1% in the Levant [137], and the Arabian  
776 Peninsula [74, 138]. Most probably, as consequence of drift effects,  
777 some populations show outstanding frequencies of L4. In western  
778 Africa, Samoya (28.6%) and Kassena (21.2%) samples, speakers of  
779 the Gur linguistic family, stand out [72]. In Ethiopia, the cases of the  
780 Omotic-speaking Hamar (18.2%), the Cushitic-speaking Daasanach  
781 (22.2%), and the Nilotic-speaking Gumuz (24.0%) and Nyangatom  
782 (21.6%) are also remarkable [129, 139]. However, without any  
783 doubt, are the Tanzanian click-speaking Hadza (58%) and Sandawe  
784 (43%) whom show the highest values for L4 in Africa [111–113],  
785 this, together with the elevated frequencies that Hadza (50%) and  
786 Sandawe (15%) present for the Y-chromosome haplogroup B-M112  
787 [140], points to human expansions from the North as those that most  
788 strongly influenced the gene pool of these groups. Attending to the  
789 age of bifurcation from L3 (around 95 kya), it could be thought that  
790 these L4 expansions occurred before our proposed return to Africa  
791 of L3 basic lineages. However, as the main spreads of its  
792 descendant clusters L4a (54.8 kya) and L4b (48.9 kya) [94, 138] had  
793 taken place around the same time window that the majority of the L3  
794 and L2 branches in Africa, the most probable explanation is that  
795 improved climatic conditions after 60 kya motivated a global  
796 demographic growth on the African continent. Noticed that the  
797 evidence for an L3 first expansion in East Africa [89] is likewise in  
798 support of the out-of-Africa scenario than of a Eurasian back-flow as  
799 proposed here. We hypothetically situated the L3'4 node in



800 northeast Africa or the Near East (Figure 1a) to allow an out-of-  
801 Africa of the pre-L3 clade. The Y-chromosome CDEF ancestor had  
802 to be its male counterpart. Other female and male lineages could  
803 have moved with them but, presumably gone extinct without  
804 contributing either to the maternal or paternal gene pools of the  
805 living human populations of Eurasia.

806 Under the scenario proposed here, early anatomically modern  
807 humans went out of Africa around 125 kya with a simple Middle  
808 Stone Age technology that was not superior to that manufactured by  
809 the Neanderthals. Favored by mild climatic conditions, these African  
810 pioneers progressed through West Asia and reached Central Asia  
811 overlapping in its way with the southern geographic range occupied  
812 by the Neanderthals. A new vision of the fossil and archaeological  
813 records of those regions [88, 141, 142] might uncover the path  
814 followed by those early African colonizers. At favorable conditions  
815 for both hominin groups, we might predict limited exchange of skills,  
816 lithic technology, and sex. However, when after 75 kya glacial  
817 environments became dominant, Neanderthals had to retreat  
818 southwards pushing out humans in its way. Confronted with the  
819 northern foothills of the Himalayas, humans moved in two directions,  
820 westwards to return to Africa, and eastwards to reach southeastern  
821 Asia across China (Figure 1b). The second part of this model has  
822 been already outlined in precedent articles [53–55].

823

#### 824 **Figure 1 title**

825 Geographic origin and dispersion of mtDNA L haplogroups: A.  
826 Sequential expansion of L haplogroups inside Africa and exit of the  
827 L3 precursor to Eurasia. B. Return to Africa and expansion to Asia of  
828 basic L3 lineages with subsequent differentiation in both continents.



829

### 830 **Additional files**

831 Additional file 1: Table S1. Complete mtDNA macrohaplogroup L  
832 sequences. Table S2. Frequencies of mtDNA haplogroups L2 and  
833 L3 and Y-chromosome haplogroup E lineages across Africa. Table  
834 S3. Coalescence ages in thousand years (kya) with 95% coefficient  
835 intervals (CI), or standard deviations, for the main mitochondrial  
836 DNA African haplogroups. Table S4. Coalescence ages in thousand  
837 years (kya) with 95% coefficient intervals (CI), or standard  
838 deviations, for Y-chromosome most recent common ancestor  
839 (MRCA), the out-of-Africa event, and the splits of haplogroup DE  
840 and E. Table S5. k-means cluster results using African populations  
841 characterized by mtDNA L3 and Y-chromosome E haplogroup  
842 frequencies. Table S6. k-means cluster results using African  
843 populations characterized by mtDNA L2 and L3 and Y-chromosome  
844 E haplogroup frequencies.

845 Additional file 2: Figure S1. Phylogenetic tree of mtDNA  
846 macrohaplogroup L complete African sequences produced in this  
847 study.

### 848 **Acknowledgements**

849 We are grateful to Dra. Ana M. González for her experimental  
850 contribution and bright ideas brought to this work. This research was  
851 supported by Grant nº CGL2010-16195 from the Spanish Ministerio  
852 de Ciencia e Innovación to JML.

### 853 **Availability of data and materials**

854 The sequence set supporting the results of this article are available  
855 in the GenBank repository (MF621062 to MF621130), Additional file

856 !: Table S1, and Additional file 2, Figure S1. References for the  
857 haplogroup frequencies used in this study are listed in Additional file  
858 1, Table S2. All results obtained from our statistical analysis are  
859 presented in tables and figures of this article and in the additional  
860 files.

### 861 **Authors' contributions**

862 VMC conceived and designed the study, analyzed the data and  
863 wrote the manuscript. PM edited and submitted mtDNA sequences,  
864 designed figures, and contributed to the data analysis independently  
865 confirming the analysis results. KKAA carried out the sequencing of  
866 the Arabian and eastern African samples and made corrections on  
867 the manuscript. JML carried out the sequencing of the Canary  
868 Islands and western African samples, and contributed to the  
869 collection of published data and their analysis. All the authors read  
870 and approved the final manuscript.

### 871 **Authors' information**

872 VMC is actually retired.

### 873 **Competing interests**

874 The authors declare that they have no competing interests.

### 875 **Consent for publication**

876 Not applicable.

### 877 **Ethics approval and consent to participate**

878 The procedure of human population sampling adhered to the tenets  
879 of the Declaration of Helsinki. Written consent was recorded from all  
880 participants prior to taking part in the study. The study underwent

881 formal review and was approved by the College of Medicine Ethical  
882 Committee of the King Saud University (proposal N°09-659), and by  
883 the Ethics Committee for Human Research at the University of La  
884 Laguna (proposal NR157).

## 885 **Author details**

886 <sup>1</sup>Departamento de Genética, Facultad de Biología, Universidad de  
887 La Laguna, E-38271, La Laguna, Tenerife, Spain. <sup>2</sup>Research  
888 Support General Service, E-38271, La Laguna, Tenerife, Spain.

889 <sup>3</sup>Glaucoma Research Chair, Department of Ophthalmology, College  
890 of Medicine, King Saud University, Riyadh, Saudi Arabia.

891 <sup>4</sup>Department of Ophthalmology and Visual Sciences, University of  
892 Illinois at Chicago, Chicago, IL, USA.

893

## 894 **References**

895 1. Cann RL, Stoneking M, Wilson AC: **Mitochondrial DNA and human evolution.**  
896 *Nature* , **325**:31–6.

897

898 2. Stringer C: **Why we are not all multiregionalists now.** *Trends in ecology &*  
899 *evolution* 2014, **29**:248–251.

900

901 3. Ingman M, Kaessmann H, Pääbo S, Gyllensten U: **Mitochondrial genome variation**  
902 **and the origin of modern humans.** *Nature* 2000, **408**:708–713.

903

904 4. Maca-Meyer N, González AM, Larruga JM, Flores C, Cabrera VM: **Major genomic**  
905 **mitochondrial lineages delineate early human expansions.** *BMC genetics* 2001, **2**:1.

906

907 5. Herrnstadt C, Elson JL, Fahy E, Preston G, Turnbull DM, Anderson C, Ghosh SS,  
908 Olefsky JM, Beal MF, Davis RE, Howell N: **Reduced-median-network analysis of**  
909 **complete mitochondrial DNA coding-region sequences for the major African,**

- 910 **Asian, and European haplogroups.** *Am. J. Hum. Genet.* 2002, **70**:1152–71.  
911
- 912 6. Soares P, Ermini L, Thomson N, Mormina M, Rito T, Röhl A, Salas A, Oppenheimer  
913 S, Macaulay V, Richards MB: **Correcting for purifying selection: an improved**  
914 **human mitochondrial molecular clock.** *Am. J. Hum. Genet.* 2009, **84**:740–59.  
915
- 916 7. Karmin M, Saag L, Vicente M, Sayres MAW, Järve M, Talas UG, Rootsi S, Iiumäe  
917 A-M, Mägi R, Mitt M, others: **A recent bottleneck of Y chromosome diversity**  
918 **coincides with a global change in culture.** *Genome research* 2015, **25**:459–466.  
919
- 920 8. Scally A, Durbin R: **Revising the human mutation rate: implications for**  
921 **understanding human evolution.** *Nature Reviews Genetics* 2012, **13**:745–753.  
922
- 923 9. Fu Q, Mittnik A, Johnson PL, Bos K, Lari M, Bollongino R, Sun C, Giemsch L,  
924 Schmitz R, Burger J, others: **A revised timescale for human evolution based on**  
925 **ancient mitochondrial genomes.** *Current Biology* 2013, **23**:553–559.  
926
- 927 10. Shea JJ, Bar-Yosef O: **Who Were The Skhul/Qafzeh People? An Archaeological**  
928 **Perspective on Eurasia’s Oldest Modern Humans.** *האבן מתקופת* 2005:451–468.  
929
- 930 11. Liu W, Martínón-Torres M, Cai Y, Xing S, Tong H, Pei S, Sier MJ, Wu X, Edwards  
931 RL, Cheng H, others: **The earliest unequivocally modern humans in southern**  
932 **China.** *Nature* 2015.  
933
- 934 12. Armitage SJ, Jasim SA, Marks AE, Parker AG, Usik VI, Uerpmann H-P: **The**  
935 **southern route “out of Africa”: evidence for an early expansion of modern humans**  
936 **into Arabia.** *Science* 2011, **331**:453–456.  
937
- 938 13. Rose JI, Usik VI, Marks AE, Hilbert YH, Galletti CS, Parton A, Geiling JM,  
939 \vCern\y V, Morley MW, Roberts RG: **The Nubian complex of Dhofar, Oman: an**  
940 **African middle stone age industry in southern Arabia.** *PLoS One* 2011, **6**:e28239.  
941
- 942 14. Petraglia MD, Alsharekh A, Breeze P, Clarkson C, Crassard R, Drake NA, Groucutt  
943 HS, Jennings R, Parker AG, Parton A, others: **Hominin dispersal into the Nefud**

- 944 **desert and Middle Palaeolithic settlement along the Jubbah palaeolake, northern**  
945 **Arabia.** *PLoS One* 2012, **7**:e49840.
- 946
- 947 15. Sankararaman S, Patterson N, Li H, Pääbo S, Reich D: **The date of interbreeding**  
948 **between Neandertals and modern humans.** *PLoS Genet* 2012, **8**:e1002947.
- 949
- 950 16. Kuhlwilm M, Gronau I, Hubisz MJ, de Filippo C, Prado-Martinez J, Kircher M, Fu  
951 Q, Burbano HA, Lalueza-Fox C, de La Rasilla M, others: **Ancient gene flow from**  
952 **early modern humans into Eastern Neanderthals.** *Nature* 2016, **530**:429–433.
- 953
- 954 17. Xing J, Watkins WS, Hu Y, Huff CD, Sabo A, Muzny DM, Bamshad MJ, Gibbs  
955 RA, Jorde LB, Yu F: **Genetic diversity in India and the inference of Eurasian**  
956 **population expansion.** *Genome Biol.* 2010, **11**:R113.
- 957
- 958 18. Pagani L, Lawson DJ, Jagoda E, Mörseburg A, Eriksson A, Mitt M, Clemente F,  
959 Hudjashov G, DeGiorgio M, Saag L, others: **Genomic analyses inform on migration**  
960 **events during the peopling of Eurasia.** *Nature* 2016, **538**:238–242.
- 961
- 962 19. Quintana-Murci L, Semino O, Bandelt H-J, Passarino G, McElreavey K,  
963 Santachiara-Benerecetti AS: **Genetic evidence of an early exit of Homo sapiens**  
964 **sapiens from Africa through eastern Africa.** *Nature genetics* 1999, **23**:437–441.
- 965
- 966 20. Quintana-Murci L, Chaix R, Wells RS, Behar DM, Sayar H, Scozzari R, Rengo C,  
967 Al-Zahery N, Semino O, Santachiara-Benerecetti AS, others: **Where west meets east:**  
968 **the complex mtDNA landscape of the southwest and Central Asian corridor.** *The*  
969 *American Journal of Human Genetics* 2004, **74**:827–845.
- 970
- 971 21. Qin Z, Yang Y, Kang L, Yan S, Cho K, Cai X, Lu Y, Zheng H, Zhu D, Fei D,  
972 others: **A mitochondrial revelation of early human migrations to the Tibetan**  
973 **Plateau before and after the last glacial maximum.** *American Journal of Physical*  
974 *Anthropology* 2010, **143**:555–569.
- 975
- 976 22. Kang L, Zheng H-X, Chen F, Yan S, Liu K, Qin Z, Liu L, Zhao Z, Li L, Wang X,  
977 others: **mtDNA lineage expansions in Sherpa population suggest adaptive evolution**

- 978 **in Tibetan highlands.** *Molecular biology and evolution* 2013:mst147.
- 979
- 980 23. Wang C-C, Wang L-X, Shrestha R, Zhang M, Huang X-Y, Hu K, Jin L, Li H:
- 981 **Genetic structure of Qiangic populations residing in the western Sichuan corridor.**
- 982 *PloS one* 2014, **9**:e103772.
- 983
- 984 24. Kong Q-P, Yao Y-G, Sun C, Bandelt H-J, Zhu C-L, Zhang Y-P: **Phylogeny of east**
- 985 **Asian mitochondrial DNA lineages inferred from complete sequences.** *Am. J. Hum.*
- 986 *Genet.* 2003, **73**:671–6.
- 987
- 988 25. Tanaka M, Cabrera VM, González AM, Larruga JM, Takeyasu T, Fuku N, Guo L-J,
- 989 Hirose R, Fujita Y, Kurata M, Shinoda K, Umetsu K, Yamada Y, Oshida Y, Sato Y,
- 990 Hattori N, Mizuno Y, Arai Y, Hirose N, Ohta S, Ogawa O, Tanaka Y, Kawamori R,
- 991 Shamoto-Nagai M, Maruyama W, Shimokata H, Suzuki R, Shimodaira H:
- 992 **Mitochondrial genome variation in eastern Asia and the peopling of Japan.**
- 993 *Genome Res.* 2004, **14**:1832–50.
- 994
- 995 26. Derenko M, Malyarchuk B, Denisova G, Perkova M, Rogalla U, Grzybowski T,
- 996 Khusnutdinova E, Dambueva I, Zakharov I: **Complete mitochondrial DNA analysis of**
- 997 **eastern Eurasian haplogroups rarely found in populations of northern Asia and**
- 998 **eastern Europe.** *PloS one* 2012, **7**:e32179.
- 999
- 1000 27. Metspalu M, Kivisild T, Metspalu E, Parik J, Hudjashov G, Kaldma K, Serk P,
- 1001 Karmin M, Behar DM, Gilbert MTP, others: **Most of the extant mtDNA boundaries**
- 1002 **in south and southwest Asia were likely shaped during the initial settlement of**
- 1003 **Eurasia by anatomically modern humans.** *BMC genetics* 2004, **5**:1.
- 1004
- 1005 28. Gounder Palanichamy M, Sun C, Agrawal S, Bandelt H-J, Kong Q-P, Khan F,
- 1006 Wang C-Y, Chaudhuri TK, Palla V, Zhang Y-P: **Phylogeny of mitochondrial DNA**
- 1007 **macrohaplogroup N in India, based on complete sequencing: implications for the**
- 1008 **peopling of South Asia.** *The American Journal of Human Genetics* 2004, **75**:966–978.
- 1009
- 1010 29. Cordaux R, Saha N, Bentley GR, Aunger R, Sirajuddin S, Stoneking M:
- 1011 **Mitochondrial DNA analysis reveals diverse histories of tribal populations from**

- 1012 **India.** *European Journal of Human Genetics* 2003, **11**:253–264.
- 1013
- 1014 30. Chandrasekar A, Kumar S, Sreenath J, Sarkar BN, Urade BP, Mallick S,  
1015 Bandopadhyay SS, Barua P, Barik SS, Basu D, others: **Updating phylogeny of**  
1016 **mitochondrial DNA macrohaplogroup m in India: dispersal of modern human in**  
1017 **South Asian corridor.** *PloS one* 2009, **4**:e7447.
- 1018
- 1019 31. Hill C, Soares P, Mormina M, Macaulay V, Meehan W, Blackburn J, Clarke D, Raja  
1020 JM, Ismail P, Bulbeck D, others: **Phylogeography and ethnogenesis of aboriginal**  
1021 **Southeast Asians.** *Molecular Biology and Evolution* 2006, **23**:2480–2491.
- 1022
- 1023 32. Summerer M, Horst J, Erhart G, Weißensteiner H, Schönherr S, Pacher D, Forer L,  
1024 Horst D, Manhart A, Horst B, others: **Large-scale mitochondrial DNA analysis in**  
1025 **Southeast Asia reveals evolutionary effects of cultural isolation in the multi-ethnic**  
1026 **population of Myanmar.** *BMC evolutionary biology* 2014, **14**:1.
- 1027
- 1028 33. Li Y-C, Wang H-W, Tian J-Y, Liu L-N, Yang L-Q, Zhu C-L, Wu S-F, Kong Q-P,  
1029 Zhang Y-P: **Ancient inland human dispersals from Myanmar into interior East**  
1030 **Asia since the Late Pleistocene.** *Scientific reports* 2015, **5**.
- 1031
- 1032 34. Hill C, Soares P, Mormina M, Macaulay V, Clarke D, Blumbach PB, Vizuete-  
1033 Forster M, Forster P, Bulbeck D, Oppenheimer S, others: **A mitochondrial**  
1034 **stratigraphy for island southeast Asia.** *The American Journal of Human Genetics*  
1035 2007, **80**:29–43.
- 1036
- 1037 35. Mona S, Grunz KE, Brauer S, Pakendorf B, Castr\`i L, Sudoyo H, Marzuki S,  
1038 Barnes RH, Schmidtke J, Stoneking M, others: **Genetic admixture history of Eastern**  
1039 **Indonesia as revealed by Y-chromosome and mitochondrial DNA analysis.**  
1040 *Molecular Biology and Evolution* 2009, **26**:1865–1877.
- 1041
- 1042 36. Tabbada KA, Trejaut J, Loo J-H, Chen Y-M, Lin M, Mirazón-Lahr M, Kivisild T,  
1043 De Ungria MCA: **Philippine mitochondrial DNA diversity: a populated viaduct**  
1044 **between Taiwan and Indonesia?** *Molecular biology and evolution* 2010, **27**:21–31.
- 1045



- 1046 37. Gunnarsdóttir ED, Li M, Bauchet M, Finstermeier K, Stoneking M: **High-**  
1047 **throughput sequencing of complete human mtDNA genomes from the Philippines.**  
1048 *Genome research* 2011, **21**:1–11.
- 1049
- 1050 38. Tumonggor MK, Karafet TM, Hallmark B, Lansing JS, Sudoyo H, Hammer MF,  
1051 Cox MP: **The Indonesian archipelago: an ancient genetic highway linking Asia and**  
1052 **the Pacific.** *Journal of human genetics* 2013, **58**:165–173.
- 1053
- 1054 39. Gomes SM, Bodner M, Souto L, Zimmermann B, Huber G, Strobl C, Röck AW,  
1055 Achilli A, Olivieri A, Torroni A, others: **Human settlement history between Sunda**  
1056 **and Sahul: a focus on East Timor (Timor-Leste) and the Pleistocenic mtDNA**  
1057 **diversity.** *BMC genomics* 2015, **16**:1.
- 1058
- 1059 40. Ingman M, Gyllensten U: **Mitochondrial genome variation and evolutionary**  
1060 **history of Australian and New Guinean aborigines.** *Genome Research* 2003,  
1061 **13**:1600–1606.
- 1062
- 1063 41. Van Holst Pellekaan SM, Ingman M, Roberts-Thomson J, Harding RM:  
1064 **Mitochondrial genomics identifies major haplogroups in Aboriginal Australians.**  
1065 *American journal of physical anthropology* 2006, **131**:282–294.
- 1066
- 1067 42. Hudjashov G, Kivisild T, Underhill PA, Endicott P, Sanchez JJ, Lin AA, Shen P,  
1068 Oefner P, Renfrew C, Villems R, others: **Revealing the prehistoric settlement of**  
1069 **Australia by Y chromosome and mtDNA analysis.** *Proceedings of the National*  
1070 *Academy of Sciences* 2007, **104**:8726–8730.
- 1071
- 1072 43. Friedlaender JS, Friedlaender FR, Hodgson JA, Stoltz M, Koki G, Horvat G,  
1073 Zhadanov S, Schurr TG, Merriwether DA: **Melanesian mtDNA complexity.** *PLoS One*  
1074 2007, **2**:e248.
- 1075
- 1076 44. Duggan AT, Evans B, Friedlaender FR, Friedlaender JS, Koki G, Merriwether DA,  
1077 Kayser M, Stoneking M: **Maternal history of Oceania from complete mtDNA**  
1078 **genomes: contrasting ancient diversity with recent homogenization due to the**  
1079 **Austronesian expansion.** *The American Journal of Human Genetics* 2014, **94**:721–

1080 733.

1081

1082 45. Macaulay V, Hill C, Achilli A, Rengo C, Clarke D, Meehan W, Blackburn J,  
1083 Semino O, Scozzari R, Cruciani F, others: **Single, rapid coastal settlement of Asia**  
1084 **revealed by analysis of complete mitochondrial genomes.** *Science* 2005, **308**:1034–  
1085 1036.

1086

1087 46. Kong Q-P, Sun C, Wang H-W, Zhao M, Wang W-Z, Zhong L, Hao X-D, Pan H,  
1088 Wang S-Y, Cheng Y-T, others: **Large-scale mtDNA screening reveals a surprising**  
1089 **matrilineal complexity in east Asia and its implications to the peopling of the**  
1090 **region.** *Molecular biology and evolution* 2011, **28**:513–522.

1091

1092 47. Fernandes V, Alshamali F, Alves M, Costa MD, Pereira JB, Silva NM, Cherni L,  
1093 Harich N, Cerny V, Soares P, others: **The Arabian cradle: mitochondrial relicts of**  
1094 **the first steps along the southern route out of Africa.** *The American Journal of*  
1095 *Human Genetics* 2012, **90**:347–355.

1096

1097 48. Cordaux R, Weiss G, Saha N, Stoneking M: **The northeast Indian passageway: a**  
1098 **barrier or corridor for human migrations?** *Molecular Biology and Evolution* 2004,  
1099 **21**:1525–1533.

1100

1101 49. Merriwether DA, Hodgson JA, Friedlaender FR, Allaby R, Cerchio S, Koki G,  
1102 Friedlaender JS: **Ancient mitochondrial M haplogroups identified in the Southwest**  
1103 **Pacific.** *Proceedings of the National Academy of Sciences of the United States of*  
1104 *America* 2005, **102**:13034–13039.

1105

1106 50. Van Holst Pellekaan S: **Genetic evidence for the colonization of Australia.**  
1107 *Quaternary International* 2013, **285**:44–56.

1108

1109 51. Pagan L, Schiffels S, Gurdasani D, Danecek P, Scally A, Chen Y, Xue Y, Haber M,  
1110 Ekong R, Oljira T, others: **Tracing the route of modern humans out of Africa by**  
1111 **using 225 human genome sequences from Ethiopians and Egyptians.** *The American*  
1112 *Journal of Human Genetics* 2015, **96**:986–991.

1113

- 1114 52. Sankararaman S, Mallick S, Dannemann M, Prüfer K, Kelso J, Pääbo S, Patterson  
1115 N, Reich D: **The genomic landscape of Neanderthal ancestry in present-day**  
1116 **humans**. *Nature* 2014, **507**:354–357.  
1117
- 1118 53. Fregel R, Cabrera V, Larruga JM, Abu-Amero KK, González AM: **Carriers of**  
1119 **Mitochondrial DNA Macrohaplogroup N Lineages Reached Australia around**  
1120 **50,000 Years Ago following a Northern Asian Route**. *PloS one* 2015, **10**:e0129839.  
1121
- 1122 54. Marrero P, Abu-Amero KK, Larruga JM, Cabrera VM: **Carriers of human**  
1123 **mitochondrial DNA macrohaplogroup M colonized India from southeastern Asia**.  
1124 *bioRxiv* 2016:047456.  
1125
- 1126 55. Larruga JM, Marrero P, Abu-Amero KK, Golubenko MV, Cabrera VM: **Carriers of**  
1127 **mitochondrial DNA macrohaplogroup R colonized Eurasia and Australasia from a**  
1128 **southeast Asia core area**. *BMC evolutionary biology* 2017, **17**:115.  
1129
- 1130 56. Magoon GR, Banks RH, Rottensteiner C, Schrack BE, Tilroe VO, Grierson AJ:  
1131 **Generation of high-resolution a priori Y-chromosome phylogenies using “next-**  
1132 **generation” sequencing data**. *bioRxiv* 2013:000802.  
1133
- 1134 57. Karafet TM, Mendez FL, Sudoyo H, Lansing JS, Hammer MF: **Improved**  
1135 **phylogenetic resolution and rapid diversification of Y-chromosome haplogroup K-**  
1136 **M526 in Southeast Asia**. *European Journal of Human Genetics* 2014.  
1137
- 1138 58. Hallast P, Batini C, Zadik D, Delser PM, Wetton JH, Arroyo-Pardo E, Cavalleri GL,  
1139 De Knijff P, Bisol GD, Dupuy BM, others: **The Y-chromosome tree bursts into leaf:**  
1140 **13,000 high-confidence SNPs covering the majority of known clades**. *Molecular*  
1141 *biology and evolution* 2015, **32**:661–673.  
1142
- 1143 59. Poznik GD, Xue Y, Mendez FL, Willems TF, Massaia A, Sayres MAW, Ayub Q,  
1144 McCarthy SA, Narechania A, Kashin S, others: **Punctuated bursts in human male**  
1145 **demography inferred from 1,244 worldwide Y-chromosome sequences**. *Nature*  
1146 *genetics* 2016, **48**:593–599.  
1147

- 1148 60. Groucutt HS, Petraglia MD, Bailey G, Scerri EM, Parton A, Clark-Balzan L,  
1149 Jennings RP, Lewis L, Blinkhorn J, Drake NA, others: **Rethinking the dispersal of**  
1150 **Homo sapiens out of Africa.** *Evolutionary Anthropology: Issues, News, and Reviews*  
1151 2015, **24**:149–164.  
1152
- 1153 61. Hammer MF, Karafet T, Rasanayagam A, Wood ET, Altheide TK, Jenkins T,  
1154 Griffiths RC, Templeton AR, Zegura SL: **Out of Africa and back again: nested**  
1155 **cladistic analysis of human Y chromosome variation.** *Mol. Biol. Evol.* 1998, **15**:427–  
1156 41.  
1157
- 1158 62. Fregel R, Delgado S: **HaploSearch: a tool for haplotype-sequence two-way**  
1159 **transformation.** *Mitochondrion* 2011, **11**:366–367.  
1160
- 1161 63. Andrews RM, Kubacka I, Chinnery PF, Lightowlers RN, Turnbull DM, Howell N:  
1162 **Reanalysis and revision of the Cambridge reference sequence for human**  
1163 **mitochondrial DNA.** *Nature genetics* 1999, **23**:147–147.  
1164
- 1165 64. Hall TA: **BioEdit: a user-friendly biological sequence alignment editor and**  
1166 **analysis program for Windows 95/98/NT.** In *Nucleic acids symposium series.* 1999,  
1167 **41**:95–98.  
1168
- 1169 65. Van Oven M, Kayser M: **Updated comprehensive phylogenetic tree of global**  
1170 **human mitochondrial DNA variation.** *Hum. Mutat.* 2009, **30**:E386–94.  
1171
- 1172 66. Bandelt H-J, Forster P, Röhl A: **Median-joining networks for inferring**  
1173 **intraspecific phylogenies.** *Molecular biology and evolution* 1999, **16**:37–48.  
1174
- 1175 67. Forster P, Harding R, Torroni A, Bandelt HJ: **Origin and evolution of Native**  
1176 **American mtDNA variation: a reappraisal.** *Am. J. Hum. Genet.* 1996, **59**:935–45.  
1177
- 1178 68. Saillard J, Forster P, Lynnerup N, Bandelt HJ, Nørby S: **mtDNA variation among**  
1179 **Greenland Eskimos: the edge of the Beringian expansion.** *Am. J. Hum. Genet.* 2000,  
1180 **67**:718–26.  
1181

- 1182 69. Collins DW, Gudiseva HV, Trachtman BT, Jerrehian M, Gorry T, Merritt WT,  
1183 Rhodes AL, Sankar PS, Regina M, Miller-Ellis E, O'Brien JM: **Mitochondrial**  
1184 **sequence variation in African-American primary open-angle glaucoma patients.**  
1185 *PLoS ONE* 2013, **8**:e76627.  
1186
- 1187 70. Barbieri C, Vicente M, Oliveira S, Bostoen K, Rocha J, Stoneking M, Pakendorf B:  
1188 **Migration and interaction in a contact zone: mtDNA variation among Bantu-**  
1189 **speakers in southern Africa.** *PloS one* 2014, **9**:e99117.  
1190
- 1191 71. Pardiñas AF, Martínez JL, Roca A, García-Vázquez E, López B: **Over the sands**  
1192 **and far away: interpreting an Iberian mitochondrial lineage with ancient Western**  
1193 **African origins.** *American Journal of Human Biology* 2014, **26**:777–783.  
1194
- 1195 72. Barbieri C, Whitten M, Beyer K, Schreiber H, Li M, Pakendorf B: **Contrasting**  
1196 **maternal and paternal histories in the linguistic context of Burkina Faso.**  
1197 *Molecular biology and evolution* 2011, **29**:1213–1223.  
1198
- 1199 73. Vyas DN, Kitchen A, Miró-Herrans AT, Pearson LN, Al-Meerri A, Mulligan CJ:  
1200 **Bayesian analyses of Yemeni mitochondrial genomes suggest multiple migration**  
1201 **events with Africa and Western Eurasia.** *American journal of physical anthropology*  
1202 2015.  
1203
- 1204 74. Abu-Amero KK, Larruga JM, Cabrera VM, González AM: **Mitochondrial DNA**  
1205 **structure in the Arabian Peninsula.** *BMC evolutionary biology* 2008, **8**:1.  
1206
- 1207 75. Mellars P, Gori KC, Carr M, Soares PA, Richards MB: **Genetic and archaeological**  
1208 **perspectives on the initial modern human colonization of southern Asia.** *Proc. Natl.*  
1209 *Acad. Sci. U.S.A.* 2013, **110**:10699–704.  
1210
- 1211 76. Underhill PA, Passarino G, Lin AA, Shen P, Lahr MM, Foley RA, Oefner PJ,  
1212 Cavalli-Sforza LL: **The phylogeography of Y chromosome binary haplotypes and**  
1213 **the origins of modern human populations.** *Annals of human genetics* 2001, **65**:43–62.  
1214

- 1215 77. Weale ME, Shah T, Jones AL, Greenhalgh J, Wilson JF, Nymadawa P, Zeitlin D,  
1216 Connell BA, Bradman N, Thomas MG: **Rare deep-rooting Y chromosome lineages in**  
1217 **humans: lessons for phylogeography.** *Genetics* 2003, **165**:229–234.  
1218
- 1219 78. Shi H, Zhong H, Peng Y, Dong Y-L, Qi X-B, Zhang F, Liu L-F, Tan S-J, Ma RZ,  
1220 Xiao C-J, others: **Y chromosome evidence of earliest modern human settlement in**  
1221 **East Asia and multiple origins of Tibetan and Japanese populations.** *BMC biology*  
1222 2008, **6**:1.  
1223
- 1224 79. Karafet TM, Mendez FL, Meilerman MB, Underhill PA, Zegura SL, Hammer MF:  
1225 **New binary polymorphisms reshape and increase resolution of the human Y**  
1226 **chromosomal haplogroup tree.** *Genome Res.* 2008, **18**:830–8.  
1227
- 1228 80. Underhill P a, Kivisild T: **Use of y chromosome and mitochondrial DNA**  
1229 **population structure in tracing human migrations.** *Annual review of genetics* 2007,  
1230 **41**:539–64.  
1231
- 1232 81. Su B, Xiao C, Deka R, Seielstad MT, Kangwanpong D, Xiao J, Lu D, Underhill P,  
1233 Cavalli-Sforza L, Chakraborty R, others: **Y chromosome haplotypes reveal**  
1234 **prehistorical migrations to the Himalayas.** *Human genetics* 2000, **107**:582–590.  
1235
- 1236 82. Thangaraj K, Singh L, Reddy AG, Rao VR, Sehgal SC, Underhill PA, Pierson M,  
1237 Frame IG, Hagelberg E: **Genetic affinities of the Andaman Islanders, a vanishing**  
1238 **human population.** *Curr. Biol.* 2003, **13**:86–93.  
1239
- 1240 83. Shea JJ: **Transitions or turnovers? Climatically-forced extinctions of Homo**  
1241 **sapiens and Neanderthals in the east Mediterranean Levant.** *Quaternary Science*  
1242 *Reviews* 2008, **27**:2253–2270.  
1243
- 1244 84. Hershkovitz I, Marder O, Ayalon A, Bar-Matthews M, Yasur G, Boaretto E,  
1245 Caracuta V, Alex B, Frumkin A, Goder-Goldeberger M, others: **Levantine cranium**  
1246 **from Manot Cave (Israel) foreshadows the first European modern humans.** *Nature*  
1247 2015.  
1248

- 1249 85. Rougier H, Milota S, Rodrigo R, Gherase M, Sarcina L, Moldovan O, Zilhão J,  
1250 Constantin S, Franciscus RG, Zollikofer CPE, Ponce de León M, Trinkaus E: **Peștera**  
1251 **cu Oase 2 and the cranial morphology of early modern Europeans.** *Proc. Natl.*  
1252 *Acad. Sci. U.S.A.* 2007, **104**:1165–70.  
1253
- 1254 86. Benazzi S, Slon V, Talamo S, Negrino F, Peresani M, Bailey SE, Sawyer S, Panetta  
1255 D, Vicino G, Starnini E, others: **The makers of the Protoaurignacian and**  
1256 **implications for Neandertal extinction.** *Science* 2015, **348**:793–796.  
1257
- 1258 87. Marks AE: **Comments after four decades of research on the Middle to Upper**  
1259 **Paleolithic transition.** *Mitteilungen der Gesellschaft für Urgeschichte* 2005, **14**:81–86.  
1260
- 1261 88. Otte M: **Central Asia as a Core Area: Iran as an Origin for the.**  
1262
- 1263 89. Soares P, Alshamali F, Pereira JB, Fernandes V, Silva NM, Afonso C, Costa MD,  
1264 Musilová E, Macaulay V, Richards MB, Cerny V, Pereira L: **The Expansion of**  
1265 **mtDNA Haplogroup L3 within and out of Africa.** *Mol. Biol. Evol.* 2012, **29**:915–27.  
1266
- 1267 90. Scozzari R, Massaia A, Trombetta B, Bellusci G, Myres NM, Novelletto A,  
1268 Cruciani F: **An unbiased resource of novel SNP markers provides a new chronology**  
1269 **for the human Y chromosome and reveals a deep phylogenetic structure in Africa.**  
1270 *Genome research* 2014, **24**:535–544.  
1271
- 1272 91. Harich N, Costa MD, Fernandes V, Kandil M, Pereira JB, Silva NM, Pereira L: **The**  
1273 **trans-Saharan slave trade-clues from interpolation analyses and high-resolution**  
1274 **characterization of mitochondrial DNA lineages.** *BMC evolutionary biology* 2010,  
1275 **10**:138.  
1276
- 1277 92. Kefi R, Hechmi M, Naouali C, Jmel H, Hsouna S, Bouzaid E, Abdelhak S, Beraud-  
1278 Colomb E, Stevanovitch A: **On the origin of Iberomaurusians: new data based on**  
1279 **ancient mitochondrial DNA and phylogenetic analysis of Afalou and Tatoralt**  
1280 **populations.** *Mitochondrial DNA Part A* 2016:1–11.  
1281



- 1282 93. Schuenemann VJ, Peltzer A, Welte B, van Pelt WP, Molak M, Wang C-C,  
1283 Furtwängler A, Urban C, Reiter E, Nieselt K, others: **Ancient Egyptian mummy**  
1284 **genomes suggest an increase of Sub-Saharan African ancestry in post-Roman**  
1285 **periods.** *Nature communications* 2017, **8**.  
1286
- 1287 94. Behar DM, VILLEMS R, Soodyall H, Blue-Smith J, Pereira L, Metspalu E, Scozzari  
1288 R, Makkan H, Tzur S, Comas D, others: **The dawn of human matrilineal diversity.**  
1289 *The American Journal of Human Genetics* 2008, **82**:1130–1140.  
1290
- 1291 95. Cruciani F, La Fratta R, Trombetta B, Santolamazza P, Sellitto D, Colomb EB,  
1292 Dugoujon J-M, Crivellaro F, Benincasa T, Pascone R, others: **Tracing past human**  
1293 **male movements in northern/eastern Africa and western Eurasia: new clues from**  
1294 **Y-chromosomal haplogroups E-M78 and J-M12.** *Molecular biology and evolution*  
1295 2007, **24**:1300–1311.  
1296
- 1297 96. Bosch E, Calafell F, Comas D, Oefner PJ, Underhill PA, Bertranpetit J: **High-**  
1298 **resolution analysis of human Y-chromosome variation shows a sharp discontinuity**  
1299 **and limited gene flow between northwestern Africa and the Iberian Peninsula.** *The*  
1300 *American Journal of Human Genetics* 2001, **68**:1019–1029.  
1301
- 1302 97. Flores C, Maca-Meyer N, Perez JA, Hernandez M, Cabrera VM: **Y-chromosome**  
1303 **differentiation in Northwest Africa.** *Human biology* 2001, **73**:513–524.  
1304
- 1305 98. Arredi B, Poloni ES, Paracchini S, Zerjal T, Fathallah DM, Makrelouf M, Pascali  
1306 VL, Novelletto A, Tyler-Smith C: **A predominantly neolithic origin for Y-**  
1307 **chromosomal DNA variation in North Africa.** *Am. J. Hum. Genet.* 2004, **75**:338–45.  
1308
- 1309 99. Trombetta B, Cruciani F, Sellitto D, Scozzari R: **A new topology of the human Y**  
1310 **chromosome haplogroup E1b1 (E-P2) revealed through the use of newly**  
1311 **characterized binary polymorphisms.** *PLoS One* 2011, **6**:e16073.  
1312
- 1313 100. Trombetta B, D'Atanasio E, Massaia A, Ippoliti M, Coppa A, Candilio F, Coia V,  
1314 Russo G, Dugoujon J-M, Moral P, others: **Phylogeographic refinement and large**  
1315 **scale genotyping of human Y chromosome haplogroup E provide new insights into**

- 1316 **the dispersal of early pastoralists in the African continent.** *Genome biology and*  
1317 *evolution* 2015, **7**:1940–1950.
- 1318
- 1319 101. Secher B, Fregel R, Larruga JM, Cabrera VM, Endicott P, Pestano JJ, González  
1320 AM: **The history of the North African mitochondrial DNA haplogroup U6 gene**  
1321 **flow into the African, Eurasian and American continents.** *BMC Evol. Biol.* 2014,  
1322 **14**:109.
- 1323
- 1324 102. Semino O, Magri C, Benuzzi G, Lin AA, Al-Zahery N, Battaglia V, Maccioni L,  
1325 Triantaphyllidis C, Shen P, Oefner PJ, others: **Origin, diffusion, and differentiation of**  
1326 **Y-chromosome haplogroups E and J: inferences on the neolithization of Europe**  
1327 **and later migratory events in the Mediterranean area.** *The American Journal of*  
1328 *Human Genetics* 2004, **74**:1023–1034.
- 1329
- 1330 103. Cruciani F, Trombetta B, Massaia A, Destro-Bisol G, Sellitto D, Scozzari R: **A**  
1331 **revised root for the human Y chromosomal phylogenetic tree: the origin of**  
1332 **patrilineal diversity in Africa.** *The American Journal of Human Genetics* 2011,  
1333 **88**:814–818.
- 1334
- 1335 104. Abu-Amero KK, Hellani A, González AM, Larruga JM, Cabrera VM, Underhill  
1336 PA: **Saudi Arabian Y-Chromosome diversity and its relationship with nearby**  
1337 **regions.** *BMC genetics* 2009, **10**:1.
- 1338
- 1339 105. Zalloua PA, Xue Y, Khalife J, Makhoul N, Debiane L, Platt DE, Royyuru AK,  
1340 Herrera RJ, Hernanz DFS, Blue-Smith J, others: **Y-chromosomal diversity in**  
1341 **Lebanon is structured by recent historical events.** *The American Journal of Human*  
1342 *Genetics* 2008, **82**:873–882.
- 1343
- 1344 106. Chen Y-S, Olckers A, Schurr TG, Kogelnik AM, Huoponen K, Wallace DC:  
1345 **mtDNA variation in the South African Kung and Khwe—and their genetic**  
1346 **relationships to other African populations.** *The American Journal of Human Genetics*  
1347 2000, **66**:1362–1383.
- 1348

- 1349 107. Soodyall H, Makkan H, Haycock P, Naidoo T: **The genetic prehistory of the**  
1350 **Khoe and San.** *Southern African Humanities* 2008, **20**:37–48.  
1351
- 1352 108. Quintana-Murci L, Quach H, Harmant C, Luca F, Massonnet B, Patin E, Sica L,  
1353 Mougouama-Daouda P, Comas D, Tzur S, others: **Maternal traces of deep common**  
1354 **ancestry and asymmetric gene flow between Pygmy hunter-gatherers and Bantu-**  
1355 **speaking farmers.** *Proceedings of the National Academy of Sciences* 2008, **105**:1596–  
1356 1601.  
1357
- 1358 109. Batini C, Lopes J, Behar DM, Calafell F, Jorde LB, Van der Veen L, Quintana-  
1359 Murci L, Spedini G, Destro-Bisol G, Comas D: **Insights into the demographic history**  
1360 **of African Pygmies from complete mitochondrial genomes.** *Molecular Biology and*  
1361 *Evolution* 2010, **28**:1099–1110.  
1362
- 1363 110. Anagnostou P, Battaglia C, Capocasa M, Boschi I, Brisighelli F, Batini C, Spedini  
1364 G, Destro-Bisol G: **Reevaluating a Model of Gender-Biased Gene Flow among Sub-**  
1365 **Saharan Hunter-Gatherers and Farmers.** *Human biology* 2013, **85**:597–606.  
1366
- 1367 111. Knight A, Underhill PA, Mortensen HM, Zhivotovsky LA, Lin AA, Henn BM,  
1368 Louis D, Ruhlen M, Mountain JL: **African Y chromosome and mtDNA divergence**  
1369 **provides insight into the history of click languages.** *Current Biology* 2003, **13**:464–  
1370 473.  
1371
- 1372 112. Henn BM, Gignoux C, Lin AA, Oefner PJ, Shen P, Scozzari R, Cruciani F,  
1373 Tishkoff SA, Mountain JL, Underhill PA: **Y-chromosomal evidence of a pastoralist**  
1374 **migration through Tanzania to southern Africa.** *Proceedings of the National*  
1375 *Academy of Sciences* 2008, **105**:10693–10698.  
1376
- 1377 113. Tishkoff SA, Gonder MK, Henn BM, Mortensen H, Knight A, Gignoux C,  
1378 Fernandopulle N, Lema G, Nyambo TB, Ramakrishnan U, others: **History of click-**  
1379 **speaking populations of Africa inferred from mtDNA and Y chromosome genetic**  
1380 **variation.** *Molecular biology and evolution* 2007, **24**:2180–2195.  
1381

- 1382 114. Gomes V, Pala M, Salas A, Álvarez-Iglesias V, Amorim A, Gómez-Carballa A,  
1383 Carracedo Á, Clarke DJ, Hill C, Mormina M, others: **Mosaic maternal ancestry in the**  
1384 **Great Lakes region of East Africa.** *Human genetics* 2015, **134**:1013.  
1385
- 1386 115. Salas A, Richards M, De la Fe T, Lareu M-V, Sobrino B, Sánchez-Diz P,  
1387 Macaulay V, Carracedo Á: **The making of the African mtDNA landscape.** *The*  
1388 *American Journal of Human Genetics* 2002, **71**:1082–1111.  
1389
- 1390 116. Coelho M, Sequeira F, Luiselli D, Beleza S, Rocha J: **On the edge of Bantu**  
1391 **expansions: mtDNA, Y chromosome and lactase persistence genetic variation in**  
1392 **southwestern Angola.** *BMC evolutionary biology* 2009, **9**:80.  
1393
- 1394 117. Pour NA, Plaster CA, Bradman N: **Evidence from Y-chromosome analysis for a**  
1395 **late exclusively eastern expansion of the Bantu-speaking people.** *European Journal*  
1396 *of Human Genetics* 2013, **21**:423–429.  
1397
- 1398 118. Marks SJ, Montinaro F, Levy H, Brisighelli F, Ferri G, Bertoncini S, Batini C,  
1399 Busby GB, Arthur C, Mitchell P, others: **Static and moving frontiers: the genetic**  
1400 **landscape of Southern African Bantu-speaking populations.** *Molecular biology and*  
1401 *evolution* 2014, **32**:29–43.  
1402
- 1403 119. Silva M, Alshamali F, Silva P, Carrilho C, Mandlate F, Trovoada MJ, \vCern\y V,  
1404 Pereira L, Soares P: **60,000 years of interactions between Central and Eastern**  
1405 **Africa documented by major African mitochondrial haplogroup L2.** *Scientific*  
1406 *reports* 2015, **5**.  
1407
- 1408 120. Watson E, Forster P, Richards M, Bandelt HJ: **Mitochondrial footprints of**  
1409 **human expansions in Africa.** *Am. J. Hum. Genet.* 1997, **61**:691–704.  
1410
- 1411 121. Prüfer K, Racimo F, Patterson N, Jay F, Sankararaman S, Sawyer S, Heinze A,  
1412 Renaud G, Sudmant PH, De Filippo C, others: **The complete genome sequence of a**  
1413 **Neanderthal from the Altai Mountains.** *Nature* 2014, **505**:43–49.  
1414

- 1415 122. Sánchez-Quinto F, Botigué LR, Civit S, Arenas C, Ávila-Arcos MC, Bustamante  
1416 CD, Comas D, Lalueza-Fox C: **North African populations carry the signature of**  
1417 **admixture with Neandertals.** *PLoS One* 2012, **7**:e47765.
- 1418
- 1419 123. Bräuer G: **The origin of modern anatomy: by speciation or intraspecific**  
1420 **evolution?** *Evolutionary Anthropology: Issues, News, and Reviews* 2008, **17**:22–37.
- 1421
- 1422 124. Richter D, Grün R, Joannes-Boyau R, Steele TE, Amani F, Rué M, Fernandes P,  
1423 Raynal J-P, Geraads D, Ben-Ncer A, others: **The age of the hominin fossils from Jebel**  
1424 **Irhoud, Morocco, and the origins of the Middle Stone Age.** *Nature* 2017, **546**:293–  
1425 296.
- 1426
- 1427 125. Mendez FL, Krahn T, Schrack B, Krahn A-M, Veeramah KR, Woerner AE,  
1428 Fomine FLM, Bradman N, Thomas MG, Karafet TM, others: **An African American**  
1429 **paternal lineage adds an extremely ancient root to the human Y chromosome**  
1430 **phylogenetic tree.** *The American Journal of Human Genetics* 2013, **92**:454–459.
- 1431
- 1432 126. Rito T, Richards MB, Fernandes V, Alshamali F, Cerny V, Pereira L, Soares P:  
1433 **The first modern human dispersals across Africa.** *PLoS ONE* 2013, **8**:e80031.
- 1434
- 1435 127. Barbieri C, Güldemann T, Naumann C, Gerlach L, Berthold F, Nakagawa H,  
1436 Mpoloka SW, Stoneking M, Pakendorf B: **Unraveling the complex maternal history**  
1437 **of Southern African Khoisan populations.** *American journal of physical*  
1438 *anthropology* 2014, **153**:435–448.
- 1439
- 1440 128. Chan EK, Hardie R-A, Petersen DC, Beeson K, Bornman RM, Smith AB, Hayes  
1441 VM: **Revised timeline and distribution of the earliest diverged human maternal**  
1442 **lineages in southern Africa.** *PloS one* 2015, **10**:e0121223.
- 1443
- 1444 129. Boattini A, Castracci L, Sarno S, Useli A, Cioffi M, Sazzini M, Garagnani P, De  
1445 Fanti S, Pettener D, Luiselli D: **mtDNA variation in East Africa unravels the history**  
1446 **of afro-asiatic groups.** *American journal of physical anthropology* 2013, **150**:375–385.
- 1447

- 1448 130. Rando J, Pinto F, Gonzalez A, Hernandez M, Larruga J, Cabrera V, BANDEL T H-  
1449 **J: Mitochondrial DNA analysis of Northwest African populations reveals genetic**  
1450 **exchanges with European, Near-Eastern, and sub-Saharan populations.** *Annals of*  
1451 *human genetics* 1998, **62**:531–550.  
1452
- 1453 131. Elmadawy MA, Nagai A, Gomaa GM, Hegazy HM, Shaaban FE, Bunai Y:  
1454 **Investigation of mtDNA control region sequences in an Egyptian population**  
1455 **sample.** *Legal Medicine* 2013, **15**:338–341.  
1456
- 1457 132. Mikkelsen M, Fendt L, Röck AW, Zimmermann B, Rockenbauer E, Hansen AJ,  
1458 Parson W, Morling N: **Forensic and phylogeographic characterisation of mtDNA**  
1459 **lineages from Somalia.** *International journal of legal medicine* 2012, **126**:573.  
1460
- 1461 133. Batai K, Babrowski KB, Arroyo JP, Kusimba CM, Williams SR: **Mitochondrial**  
1462 **DNA diversity in two ethnic groups in Southeastern Kenya: perspectives from the**  
1463 **northeastern periphery of the Bantu expansion.** *American journal of physical*  
1464 *anthropology* 2013, **150**:482–491.  
1465
- 1466 134. Badro DA, Douaihy B, Haber M, Youhanna SC, Salloum A, Ghassibe-Sabbagh M,  
1467 Johnsrud B, Khazen G, Matisoo-Smith E, Soria-Hernanz DF, others: **Y-chromosome**  
1468 **and mtDNA genetics reveal significant contrasts in affinities of modern Middle**  
1469 **Eastern populations with European and African populations.** *PloS one* 2013,  
1470 **8**:e54616.  
1471
- 1472 135. Kivisild T, Reidla M, Metspalu E, Rosa A, Brehm A, Pennarun E, Parik J,  
1473 Geberhiwot T, Usanga E, Villems R: **Ethiopian mitochondrial DNA heritage:**  
1474 **tracking gene flow across and around the gate of tears.** *Am. J. Hum. Genet.* 2004,  
1475 **75**:752–70.  
1476
- 1477 136. Rosenberg T, Preusser F, Fleitmann D, Schwalb A, Penkman K, Schmid T, Al-  
1478 Shanti M, Kadi K, Matter A: **Humid periods in southern Arabia: windows of**  
1479 **opportunity for modern human dispersal.** *Geology* 2011, **39**:1115–1118.  
1480

- 1481 137. Bekada A, Fregel R, Cabrera VM, Larruga JM, Pestano J, Benhamamouch S,  
1482 González AM: **Introducing the Algerian mitochondrial DNA and Y-chromosome**  
1483 **profiles into the North African landscape.** *PLoS ONE* 2013, **8**:e56775.  
1484
- 1485 138. Fernandes V, Triska P, Pereira JB, Alshamali F, Rito T, Machado A, Fajkošová  
1486 Z, Cavadas B, Cerný V, Soares P, others: **Genetic stratigraphy of key**  
1487 **demographic events in Arabia.** *PloS one* 2015, **10**:e0118625.  
1488
- 1489 139. Poloni ES, Naciri Y, Bucho R, Niba R, Kervaire B, Excoffier L, Langaney A,  
1490 Sanchez-Mazas A: **Genetic evidence for complexity in ethnic differentiation and**  
1491 **history in East Africa.** *Annals of human genetics* 2009, **73**:582–600.  
1492
- 1493 140. Wood ET, Stover DA, Ehret C, Destro-Bisol G, Spedini G, McLeod H, Louie L,  
1494 Bamshad M, Strassmann BI, Soodyall H, others: **Contrasting patterns of Y**  
1495 **chromosome and mtDNA variation in Africa: evidence for sex-biased demographic**  
1496 **processes.** *European Journal of Human Genetics* 2005, **13**:867–876.  
1497
- 1498 141. Vishnyatsky LB: **The Paleolithic of Central Asia.** *Journal of World Prehistory*  
1499 1999, **13**:69–122.  
1500
- 1501 142. Gaillard C, Singh M, Malassé AD: **Late Pleistocene to early Holocene lithic**  
1502 **industries in the southern fringes of the Himalaya.** *Quaternary International* 2011,  
1503 **229**:112–122.  
1504  
1505  
1506  
1507  
1508  
1509  
1510  
1511



1512 TABLES

1513 **Table 1. MtDNA and NRY mean values for MRCA, Out-of-Africa**  
 1514 **and haplogroup coalescences**

| 1515   | 1516                     | 1517          | 1518                | 1519 | 1520 |
|--------|--------------------------|---------------|---------------------|------|------|
| 1521   | 1522                     | 1523          | 1524                | 1525 | 1526 |
| 1527   | 1528                     | 1529          | 1530                | 1531 | 1532 |
| 1533   | 1534                     | 1535          | 1536                | 1537 | 1538 |
| 1539   | 1540                     | 1541          | 1542                | 1543 | 1544 |
| 1545   | 1546                     | 1547          | 1548                | 1549 | 1550 |
| 1551   | 1552                     | 1553          | 1554                | 1555 | 1556 |
| Marker | MRCA                     | Out-of-Africa | Haplogroup splits   |      |      |
| MtDNA  | 184 ± 61.0               | 71.0 ± 12.0*  | L3'4'6: 95.8 ± 14.0 |      |      |
|        |                          | 71.0 ± 8.0**  | L3'4: 84.1 ± 8.6    |      |      |
| NRY    | 171.5 ± 13.7             | 93.9 ± 25.3   | DE: 69.0 ± 6.7      |      |      |
|        |                          |               | E: 65.5 ± 8.5       |      |      |
|        | *L3 Africa; **L3 Eurasia |               |                     |      |      |

1525

1526

1527

1528

1529

1530

1531

1532

1533

1534

1535 **Table 2. MtDNA and Y-Chromosome mean haplogroup frequencies**  
 1536 **in the major regions of the African continent**

| 1537        | 1538        | 1539       | 1540        | 1541        | 1542        | 1543        | 1544 | 1545 | 1546 | 1547 | 1548 | 1549 | 1550 | 1551 |
|-------------|-------------|------------|-------------|-------------|-------------|-------------|------|------|------|------|------|------|------|------|
| Haplogroup  | NW Africa   | NE Africa  | W Sahel     | E Sahel     | W Guinea    | C Africa    | East |      |      |      |      |      |      |      |
| Guinea      | S. Africa   |            |             |             |             |             |      |      |      |      |      |      |      |      |
| mt-L0       | 0.90±0.88   | 2.50±1.00  | 1.52±0.91   | 7.56±3.94   | 2.27±3.03   | 4.35±2.10   |      |      |      |      |      |      |      |      |
| 30.55±6.58  | 56.5±8.03   |            |             |             |             |             |      |      |      |      |      |      |      |      |
| mt-L1       | 5.01±1.31   | 2.72±0.62  | 17.83±2.90  | 3.47±2.77   | 15.78±7.30  | 34.85±6.55  |      |      |      |      |      |      |      |      |
| 4.72±3.14   | 2.13±0.50   |            |             |             |             |             |      |      |      |      |      |      |      |      |
| mt-L2       | 7.96±6.37   | 6.03±3.28  | 30.88±15.52 | 19.07±12.91 | 36.21±11.26 | 22.35±12.99 |      |      |      |      |      |      |      |      |
| 10.70±6.99  | 16.15±16.17 |            |             |             |             |             |      |      |      |      |      |      |      |      |
| mt-L3       | 12.06±7.05  | 13.93±5.74 | 31.85±17.83 | 27.06±12.64 | 36.82±10.66 | 33.10±17.51 |      |      |      |      |      |      |      |      |
| 35.59±11.57 | 23.84±18.80 |            |             |             |             |             |      |      |      |      |      |      |      |      |

|      |             |              |             |             |             |            |             |
|------|-------------|--------------|-------------|-------------|-------------|------------|-------------|
| 1552 |             |              |             |             |             |            |             |
| 1553 | mt-L4       | 0.24±0.14    | 1.34±0.21   | 0           | 4.94±3.19   | 0          | 0.20±1.25   |
| 1554 | 9.14±4.78   | 0.57±0.31    |             |             |             |            |             |
| 1555 |             |              |             |             |             |            |             |
| 1556 | mt-L5       | 0.02±0.04    | 0.49±0.68   | 0           | 4.23±3.54   | 0          | 0.10±1.30   |
| 1557 | 2.47±1.84   | 0.45±0.23    |             |             |             |            |             |
| 1558 |             |              |             |             |             |            |             |
| 1559 | mt-L6       | 0.04±0.09    | 0.08±0.12   | 0           | 0.91±1.41   | 0          | 0           |
| 1560 | 0.27±0.38   | 0            |             |             |             |            |             |
| 1561 |             |              |             |             |             |            |             |
| 1562 | mtMN        | 73.77± 10.88 | 72.91±7.70  | 17.92±5.02  | 32.76±4.56  | 8.92±3.34  | 5.05±3.13   |
| 1563 | 6.56±4.73   | 0.36±0.28    |             |             |             |            |             |
| 1564 |             |              |             |             |             |            |             |
| 1565 | Y-A         | 0.09±0.15    | 0.68±0.95   | 0           | 10.72±4.73  | 1.18±1.85  | 0.59±0.42   |
| 1566 | 7.95±8.54   | 8.45±2.90    |             |             |             |            |             |
| 1567 |             |              |             |             |             |            |             |
| 1568 | Y-B         | 0.34±0.31    | 0           | 0           | 8.96±13.18  | 2.14±3.23  | 7.23±3.48   |
| 1569 | 17.48±10.97 | 10.70±3.34   |             |             |             |            |             |
| 1570 |             |              |             |             |             |            |             |
| 1571 | Y-E         | 76.65±15.46  | 49.64±17.76 | 84.10±13.72 | 51.01±23.12 | 92.76±6.46 | 79.16±22.13 |
| 1572 | 73.24±20.48 | 69.51±25.70  |             |             |             |            |             |
| 1573 |             |              |             |             |             |            |             |
| 1574 | Y-F         | 22.92±7.35   | 49.68±8.00  | 15.90±5.36  | 29.31±6.08  | 3.92±2.87  | 13.02±3.44  |
| 1575 | 1.33±1.21   | 11.34±4.12   |             |             |             |            |             |
| 1576 |             |              |             |             |             |            |             |
| 1577 |             |              |             |             |             |            |             |
| 1578 |             |              |             |             |             |            |             |
| 1579 |             |              |             |             |             |            |             |
| 1580 |             |              |             |             |             |            |             |
| 1581 |             |              |             |             |             |            |             |
| 1582 |             |              |             |             |             |            |             |

### Table 3. AMOVA and k-mean clustering results

| Statistic | Variance %         |                 |       |
|-----------|--------------------|-----------------|-------|
|           | within populations | between regions |       |
| 1585      |                    |                 |       |
| 1586      | AMOVA              | 96.00           | 4.00  |
| 1587      | k-2 clustering     | 43.57           | 56.43 |
| 1588      | k-3 clustering     | 29.68           | 70.32 |
| 1589      | k-4 clustering     | 23.74           | 76.26 |
| 1590      | k-5 clustering     | 19.40           | 80.60 |
| 1591      | k-6 clustering     | 16.75           | 83.25 |
| 1592      | k-7 clustering     | 13.94           | 86.06 |

1593  
1594  
1595  
1596  
1597  
1598  
1599  
1600  
1601  
1602  
1603  
1604  
1605  
1606  
1607  
1608

1609  
1610  
1611  
1612  
1613  
1614  
1615  
1616

1617 **Table 4. Frequency values for k-means centroids in 1 to**  
1618 **5 classes**

| 1619 | Clase | values L3/E | mt-L3 | Y-E  |
|------|-------|-------------|-------|------|
| 1620 | 1     | low/low     | 16.9  | 25.9 |
| 1621 | 2     | low/medium  | 17.6  | 57.4 |
| 1622 | 3     | low/high    | 17.2  | 86.6 |
| 1623 | 4     | medium/high | 36.2  | 92.9 |
| 1624 | 5     | high/high   | 55.0  | 87.2 |

1625  
1626  
1627  
1628  
1629  
1630  
1631  
1632  
1633

1634

1635

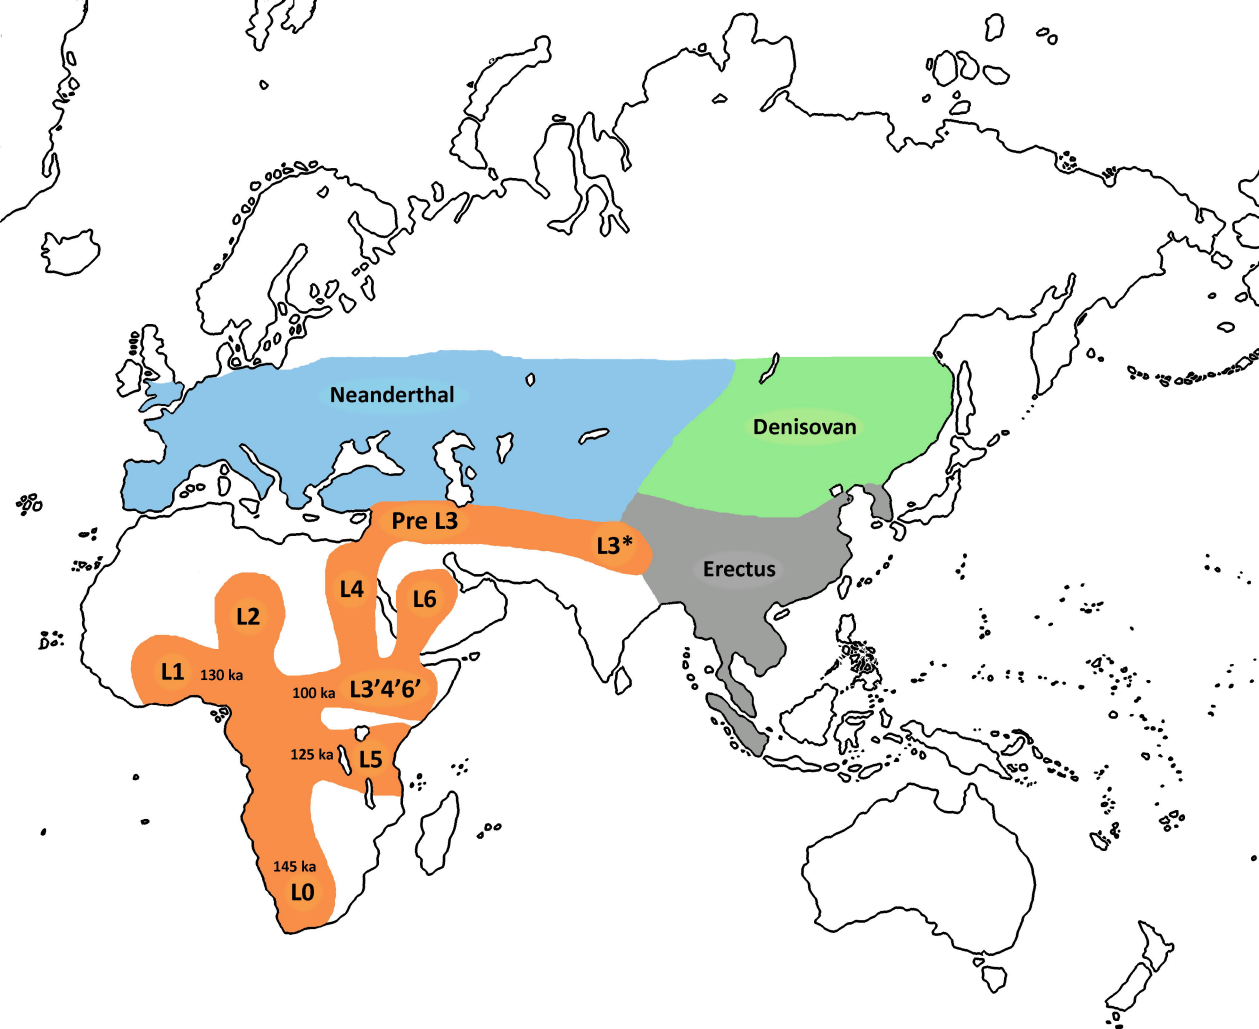

(a)

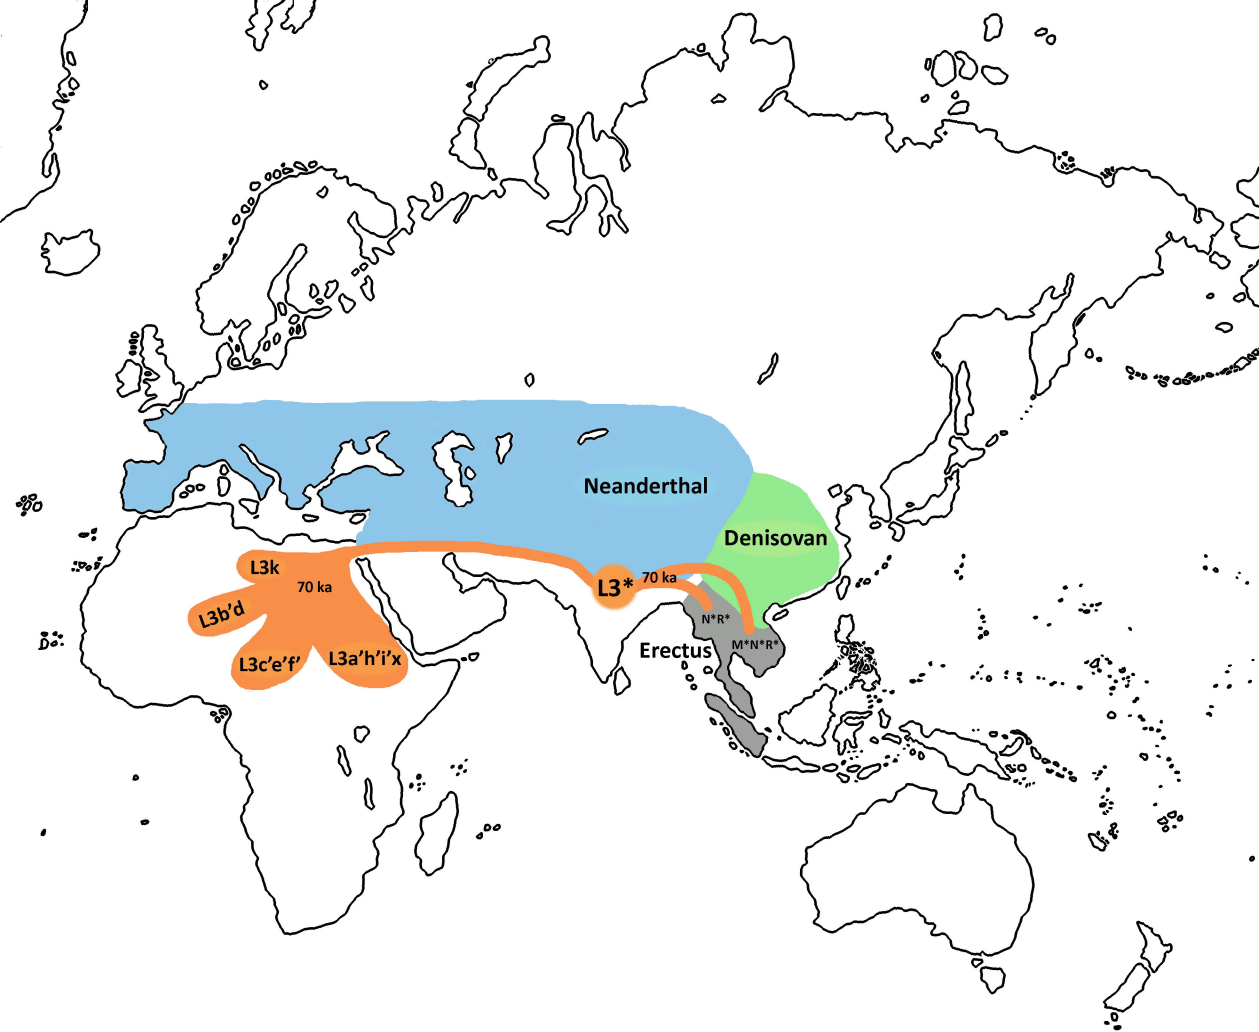

(b)
